# Supplementary material for: Novel Tough and Transparent Ultra-Extensible Nanocomposite Elastomers Based on Poly(2-methoxyethylacrylate) and Their Switching between Plasto-Elasticity and Viscoelasticity
Source: MDPI journal article supplement (doi:10.3390/polym13234254), 2021-12-04
Supplement: s1 [file s1]

## **SUPPLEMENTARY INFORMATION**

### **Novel Tough and Transparent Ultra-Extensible Nanocomposite Elastomers Based on poly(2-methoxyethylacrylate) and Their Switching between Plasto-Elasticity and Viscoelasticity**

Katarzyna Byś<sup>1</sup>, Beata Strachota<sup>1</sup>, Adam Strachota<sup>1\*</sup>, Ewa Pavlova<sup>1</sup>, Miloš Steinhart<sup>1</sup>, Beata Mossety-Leszczak<sup>2</sup>, Weronika Zając<sup>3</sup>

*<sup>1)</sup> Institute of Macromolecular Chemistry, Czech Academy of Sciences, Heyrovskeho nam. 2, CZ-162 06 Praha, Czech Republic*

*<sup>2)</sup> Rzeszow University of Technology, al. Powstancow Warszawy 6, 35-959 Rzeszow, Poland*

*<sup>3)</sup> Doctoral School of Engineering and Technical Sciences at the Rzeszow University of Technology, al. Powstancow Warszawy 12, 35-959 Rzeszow, Poland*

## 1. Synthesis

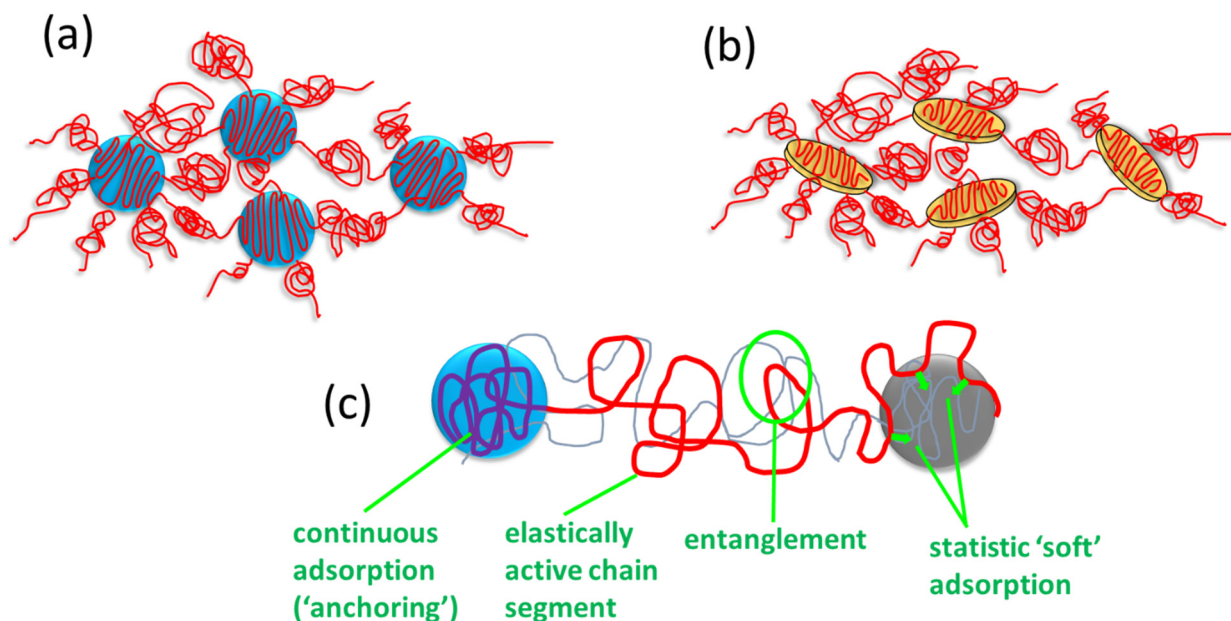

**SI-Figure S1.** Idealized self-assembly of the nanocomposite elastomeric networks polyMEA/nano-SiO<sub>2</sub> (a) and polyMEA/clay (b), based entirely on physical crosslinking.

after 24h

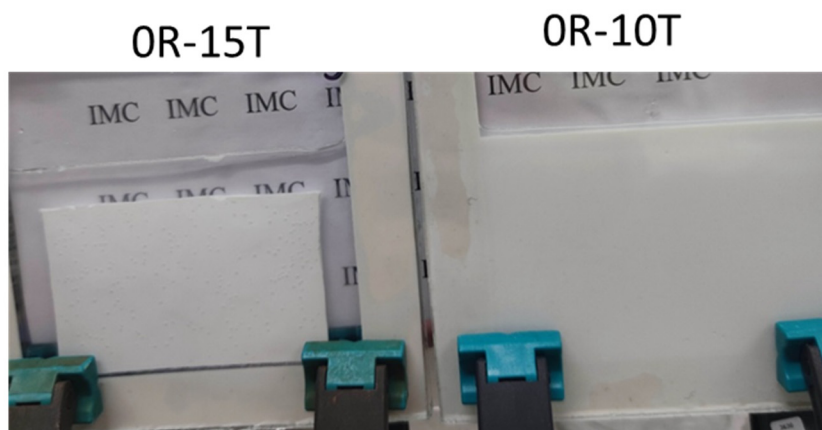

**SI- Figure S2.** Comparison of appearance of shrinking synthesis mixture with 15 or more wt.% of in-situ nano-silica (example: 0R-15T, left) with a non-shrinking one (example: 0R-10T, right); appearance after 24 h since the start of the synthesis.

**Morphology: TEM ('as prepared' state): High-resolution images**

*SI-Figure S2 – multi-page:*

neat polyMEA

**(a)**

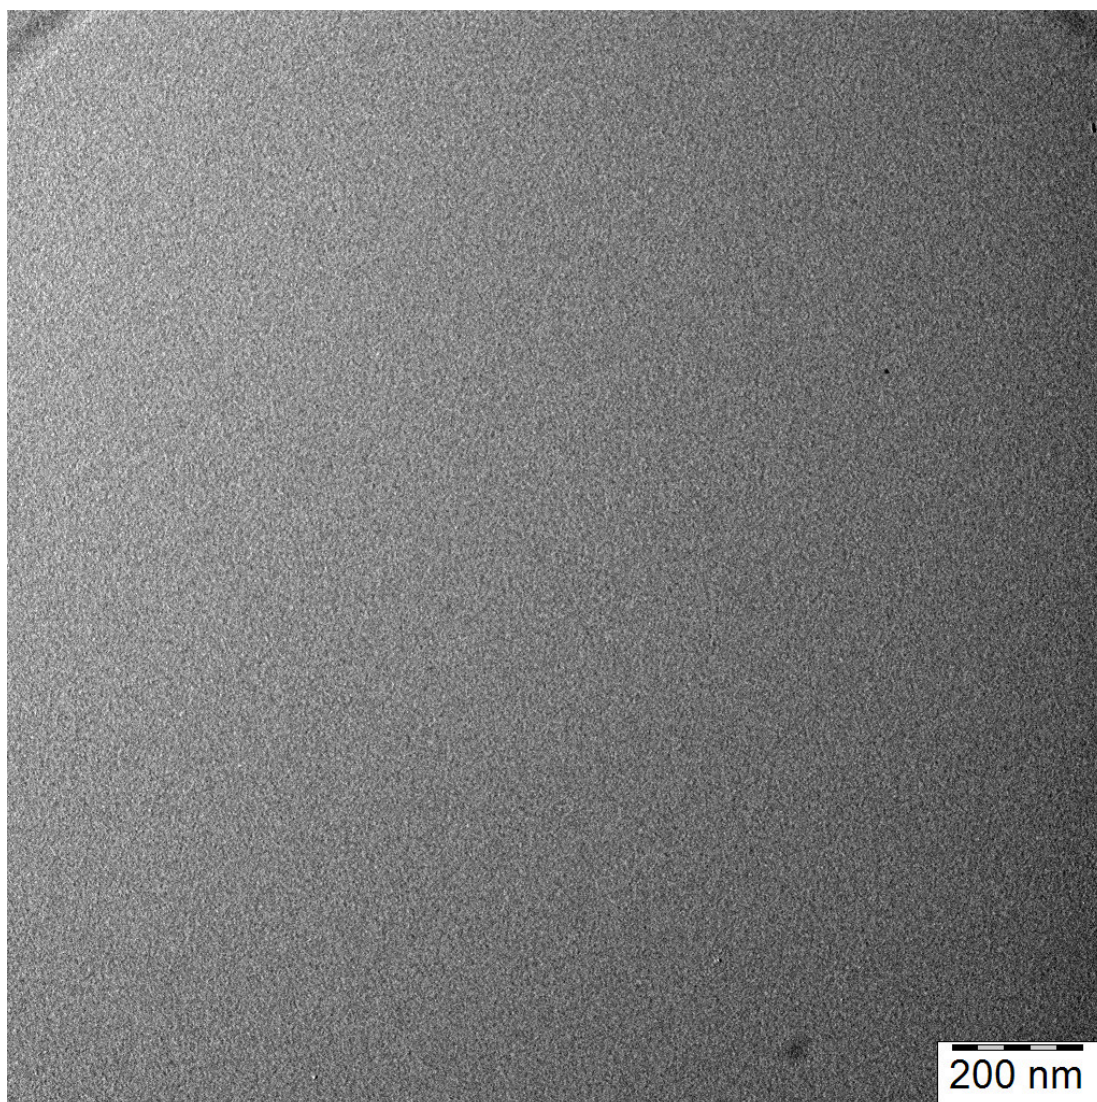

*SI-Figure S2 – multi-page:* (a) High-resolution version of the TEM image of neat polyMEA.



*SI-Figure S2 – multi-page (continued):*

0R-5T

**(b)**

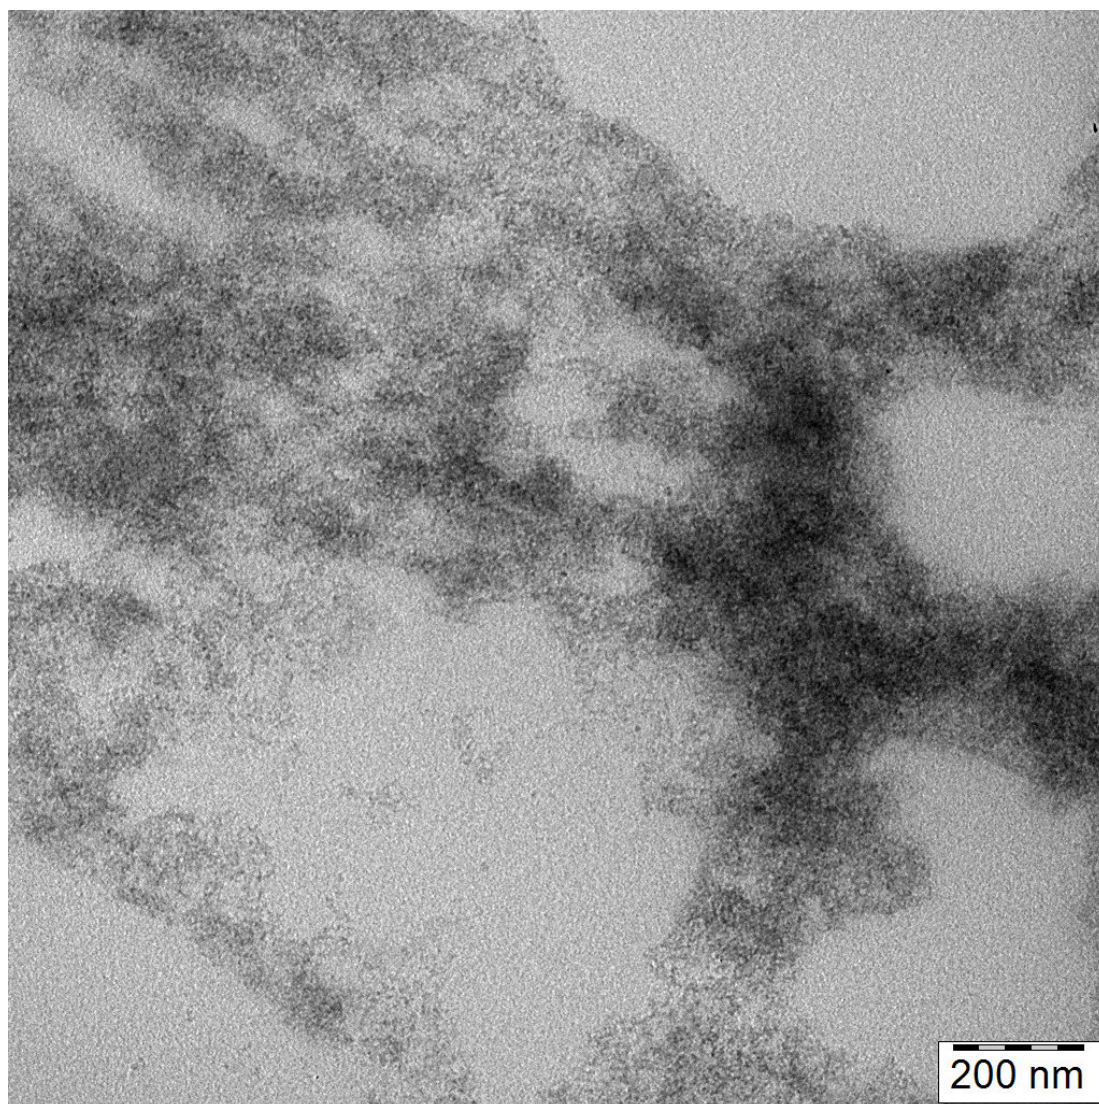

*SI-Figure S2 – multi-page (continued): (b) High-resolution version of the TEM image of 0R-5T.*



*SI-Figure S2 – multi-page (continued):*

0R-15T

(c)

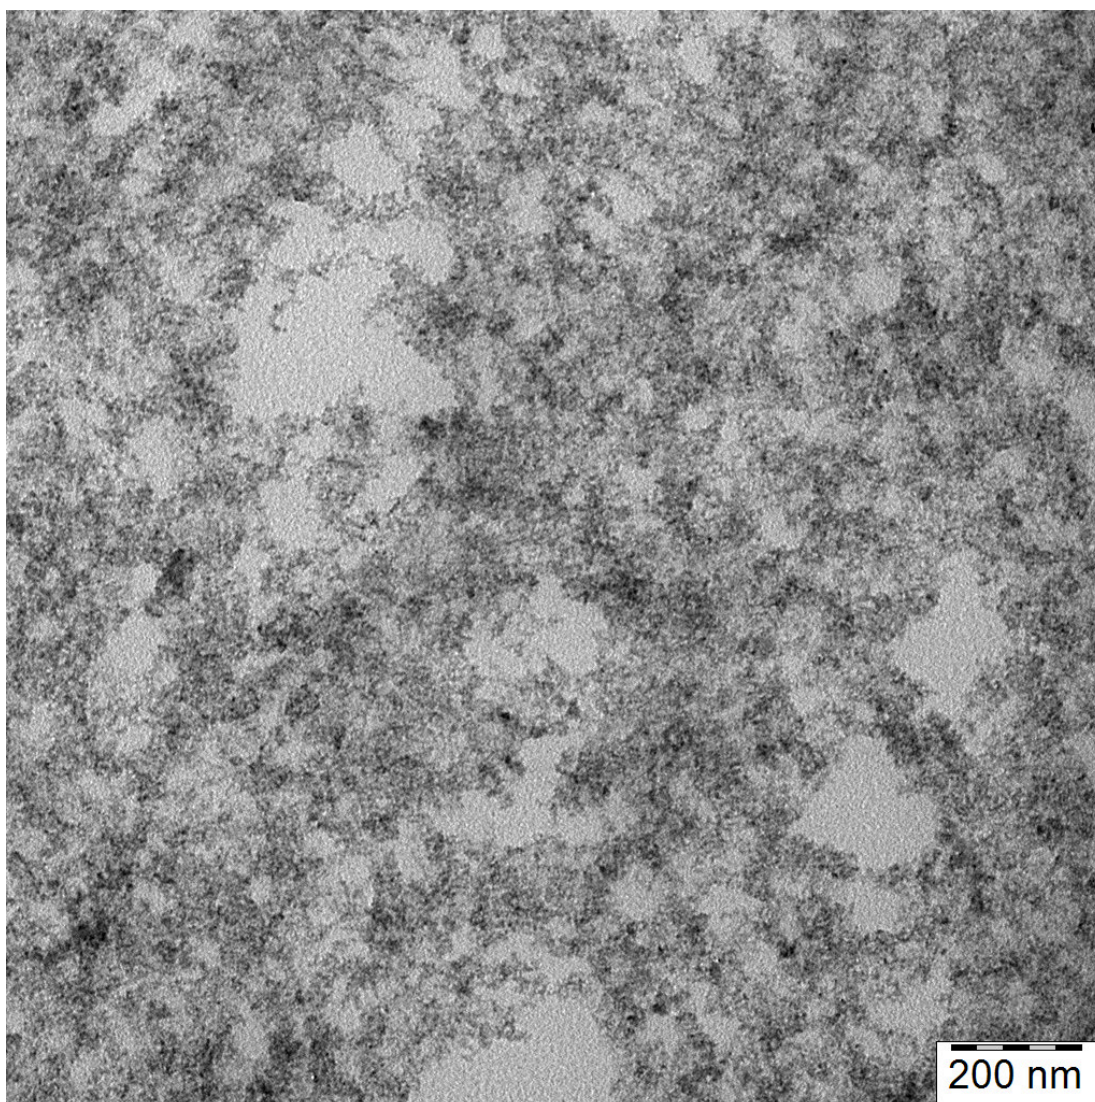

*SI-Figure S2 – multi-page (continued): (c) High-resolution version of the TEM image of 0R-15T.*

*SI-Figure S2 – multi-page (continued):*

4R-0T

**(d)**

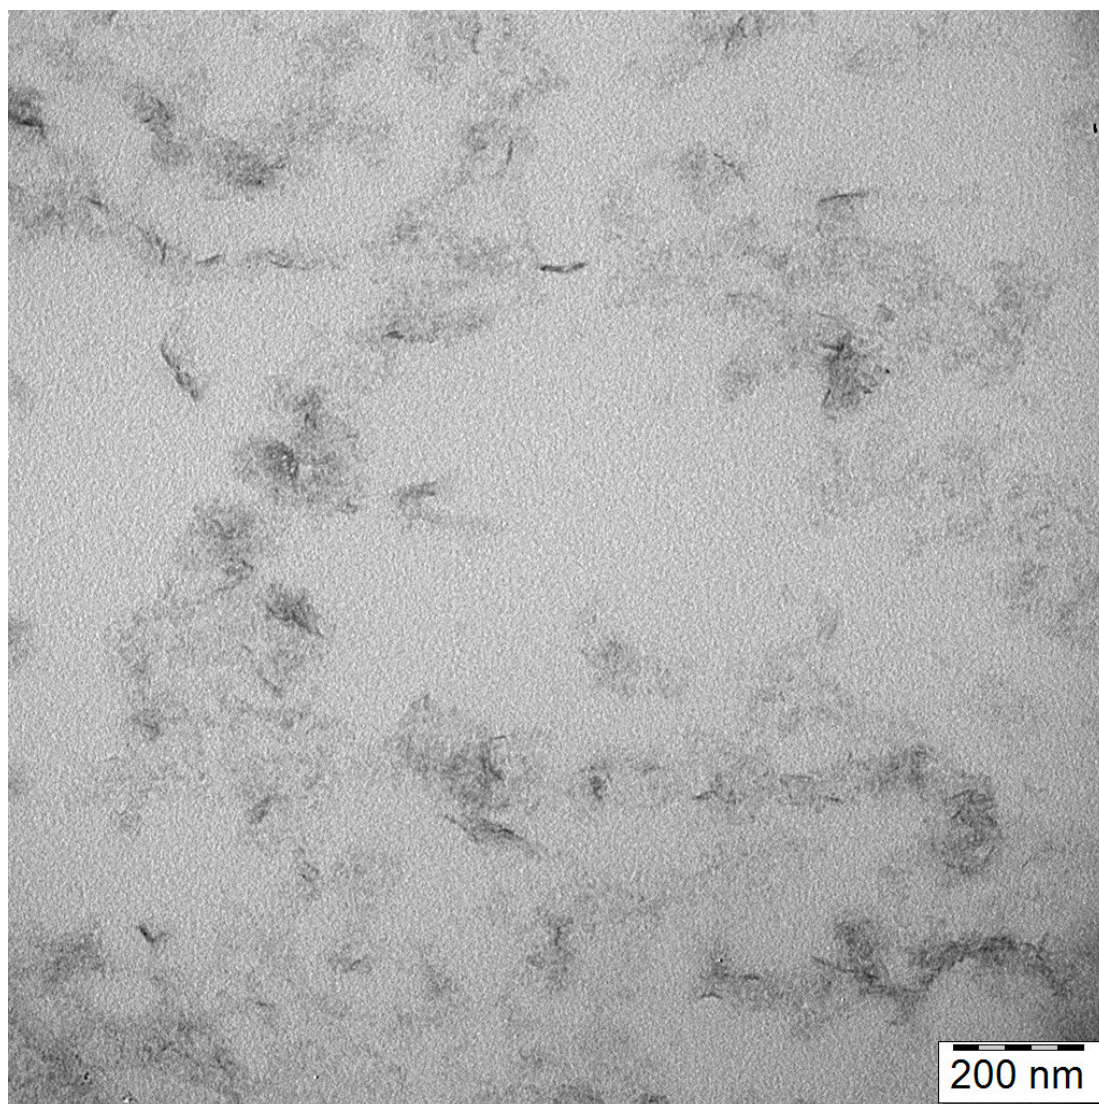

*SI-Figure S2 – multi-page (continued): (d) High-resolution version of the TEM image of 4R-0T.*



*SI-Figure S2 – multi-page (continued):*

## 4R-0T, larger-scale-view

(d2)

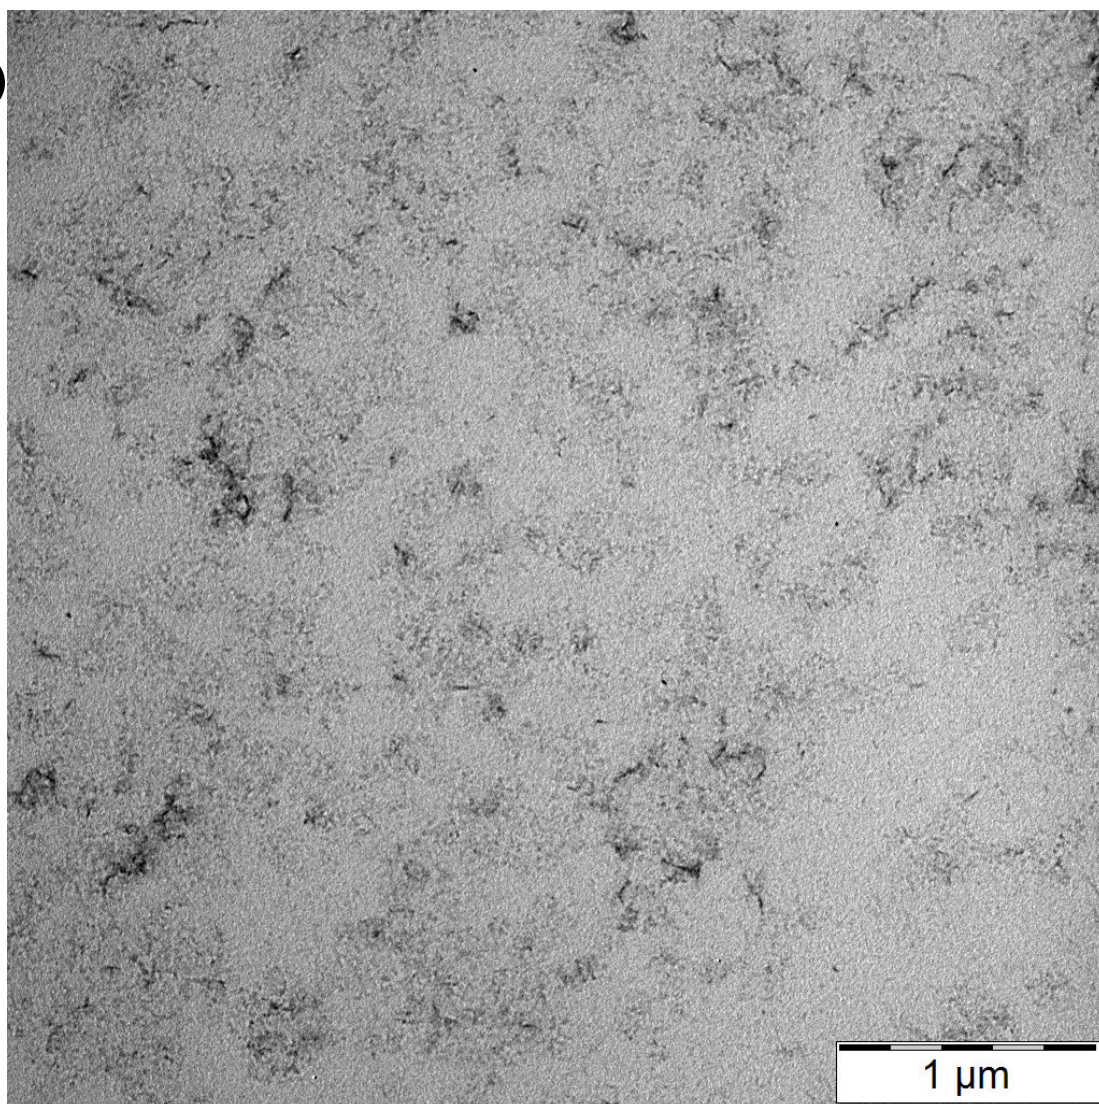

*SI-Figure S2 – multi-page (continued): (d2) TEM: larger-scale-view of 4R-0T.*



*SI-Figure S2 – multi-page (continued):*

4R-5T

(e)

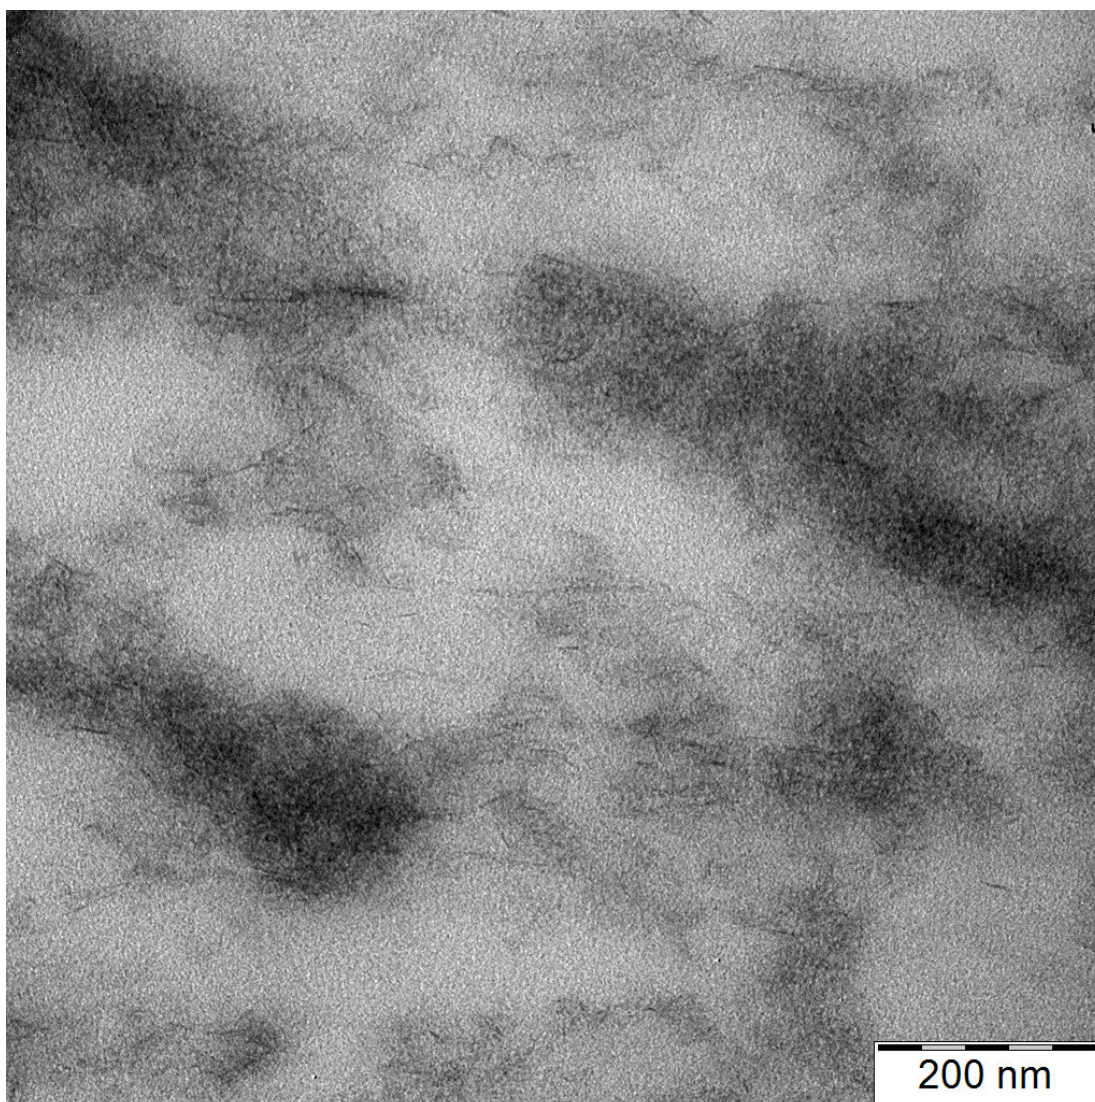

*SI-Figure S2 – multi-page (continued): (e) High-resolution version of the TEM image of 4R-5T.*



***SI-Figure S2 – multi-page (continued):***

## **4R-5T, larger-scale-view**

**(e2)**

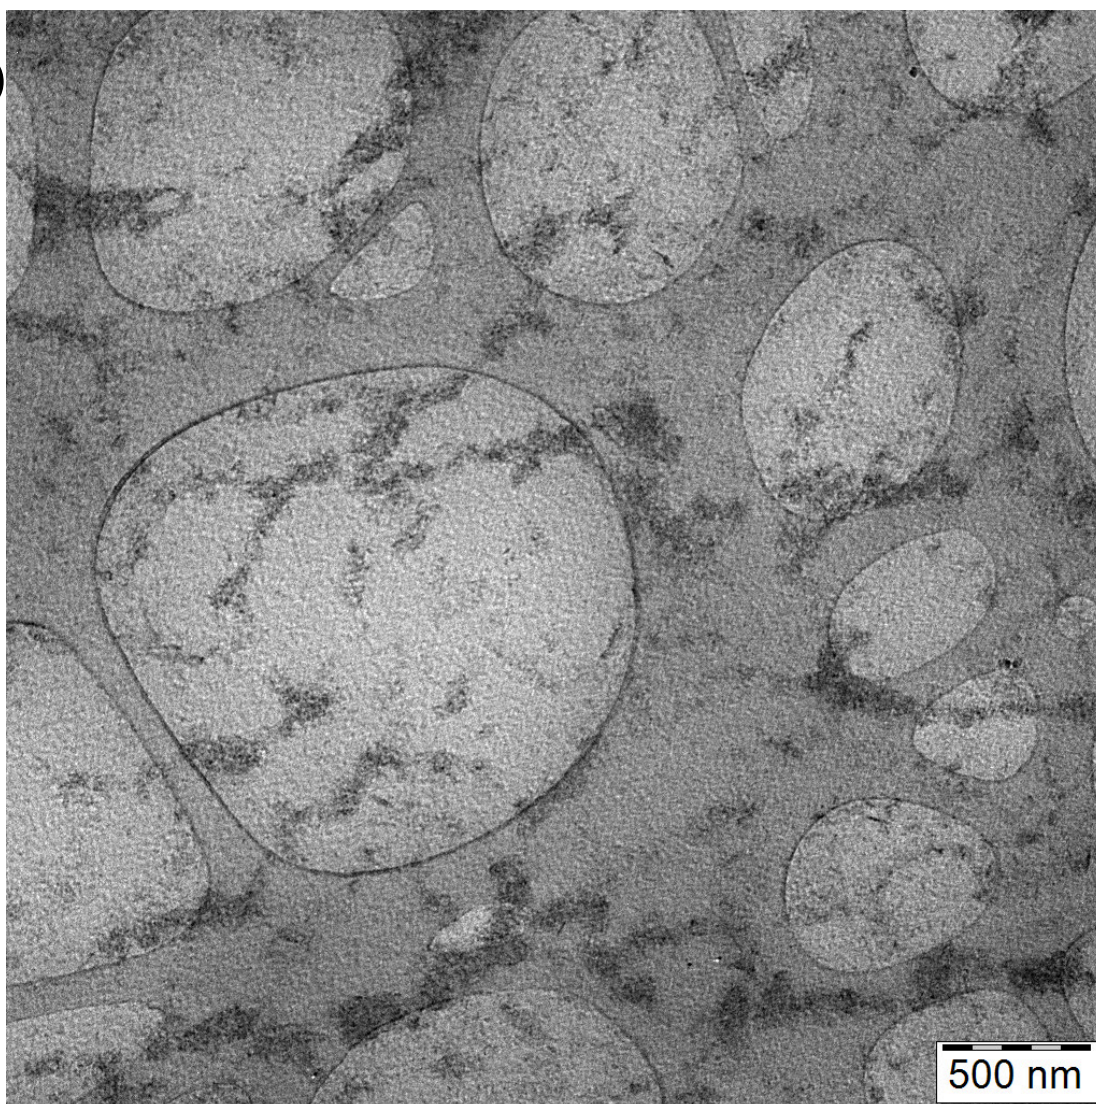

***SI-Figure S2 – multi-page (continued): (e2) TEM: larger-scale-view of 4R-5T; note (!): the visible large 'pores' or 'bubbles' are not related to the sample itself: this are pores in the graphite substrate which was used to support the observed specimen.***

*SI-Figure S2 – multi-page (continued):*

4R-15T

(f)

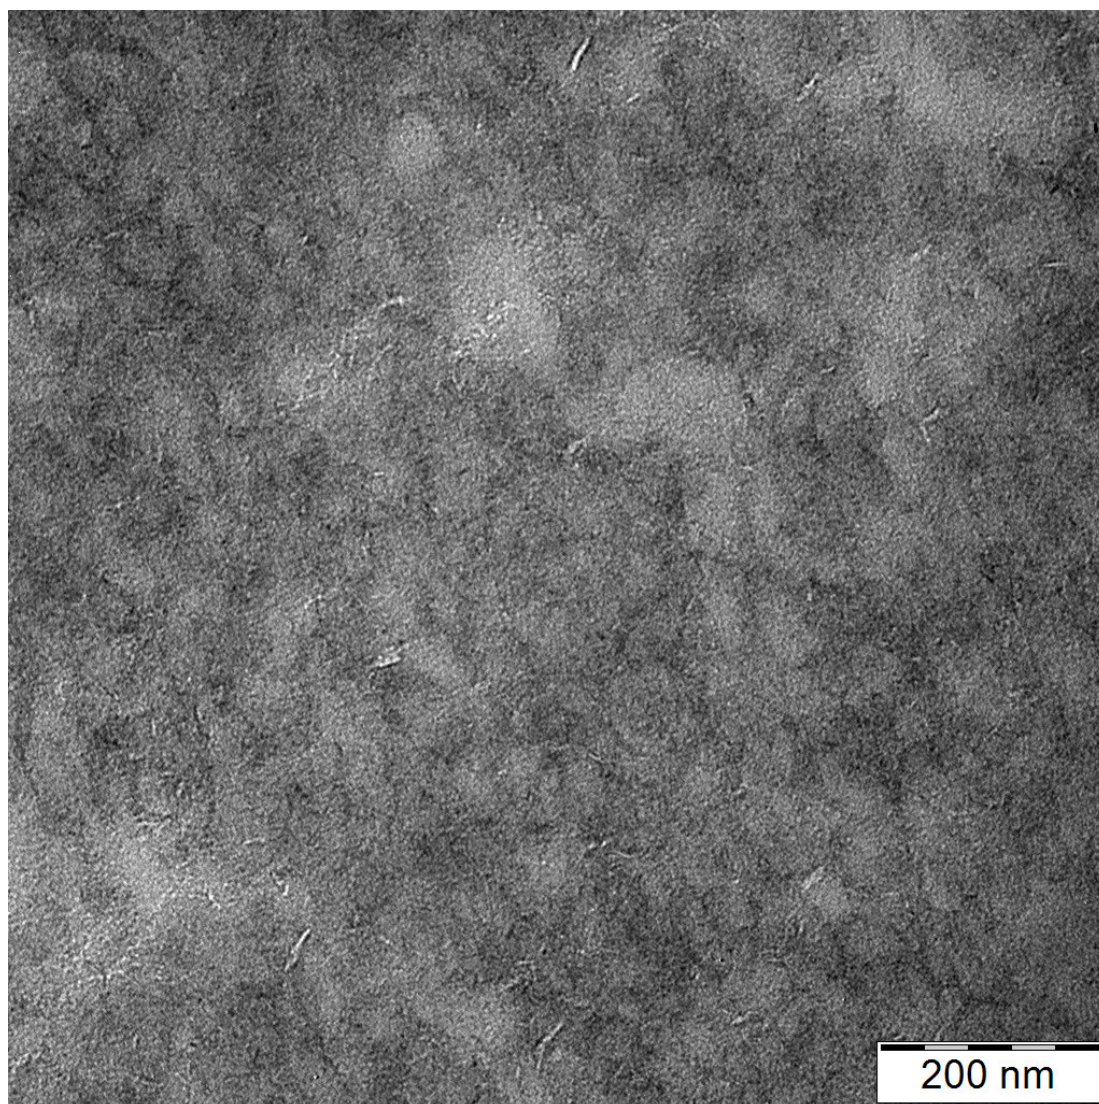

*SI-Figure S2 – multi-page (continued): (f) High-resolution version of the TEM image of 4R-15T.*



*SI-Figure S2 – multi-page (continued, last image):*

## **4R-15T, larger-scale-view**

**(f2)**

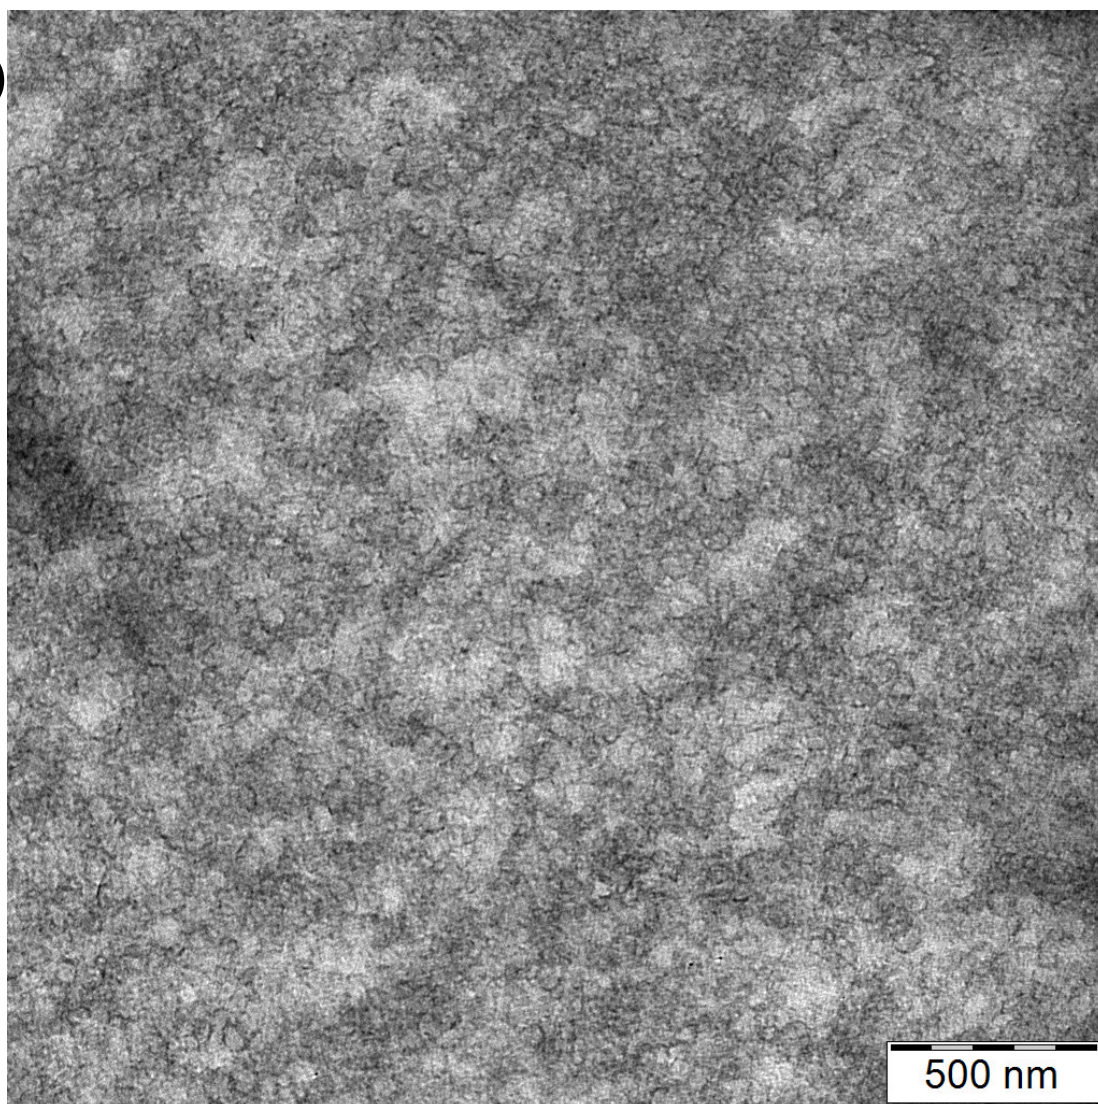

*SI-Figure S2 – multi-page (continued, last image): (f2) ) TEM: larger-scale-view of 4R-15T.*

## X-ray diffraction (Morphology): detailse view of SAXS region

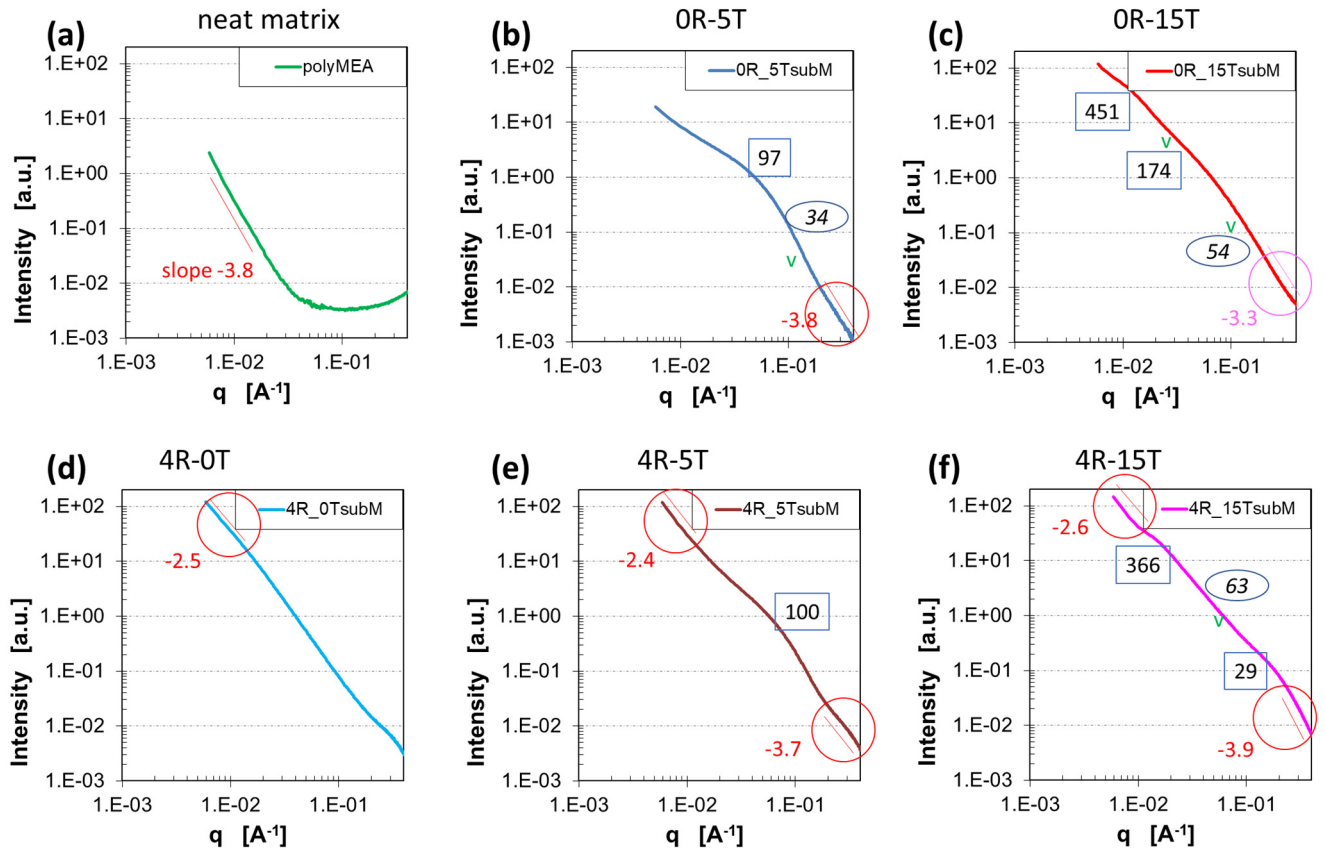

**SI-Figure S3:** Details of X-Ray scattering patterns after subtraction of matrix intensity: (a) neat polyMEA; (b) polyMEA + 5% of SiO<sub>2</sub>; (c) with 15% of SiO<sub>2</sub>; (d) with 4% of clay; (e) with 4% of clay + 5% of SiO<sub>2</sub>; (f) with 4% of clay + 15% of SiO<sub>2</sub>; labels: calculated characteristic distances (attempted subtraction of both polyMEA and Clay is illustrated below, in SI-Figure S4).

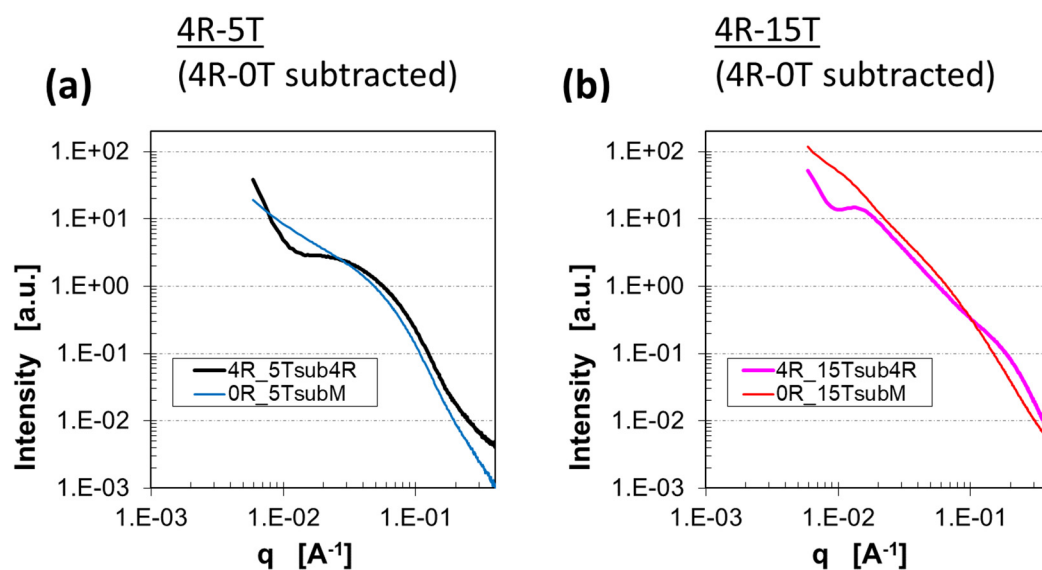

**SI-Figure S4:** Patterns of the SAXS region of the doubly filled samples 4R-5T and 4R-15T obtained by subtraction of the curve of the clay-containing matrix (4R-0T) from the original curves of the mentioned samples; the results suggest, that the fillers are not distributed independently of each other, which leads to strange shapes of the curves after subtraction.



## 2. Tensile properties

### Shear moduli at small deformation after preparation and different treatment

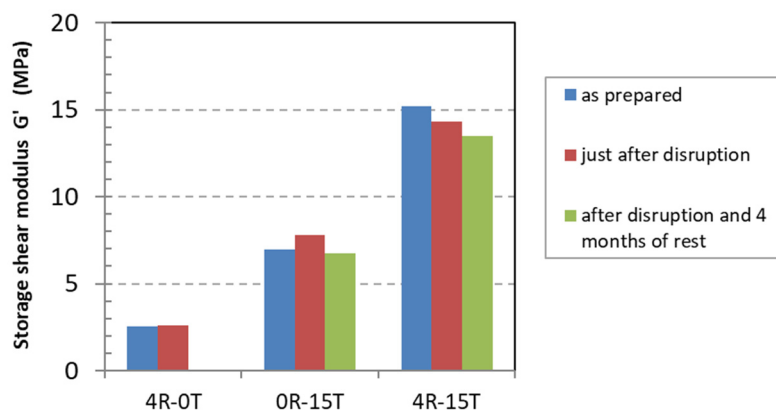

**SI-Figure S5:** Shear moduli at small deformation (as determined in torsion experiments), for the most important nanocomposite samples, in different states: (blue columns) as prepared; (red columns) just after disruption in tensile experiment; (green columns) after tensile disruption and subsequent 4-month-rest; corresponding Young's moduli can be calculated as  $E = 3 G$ .

### Hysteresis tests in the as prepared state

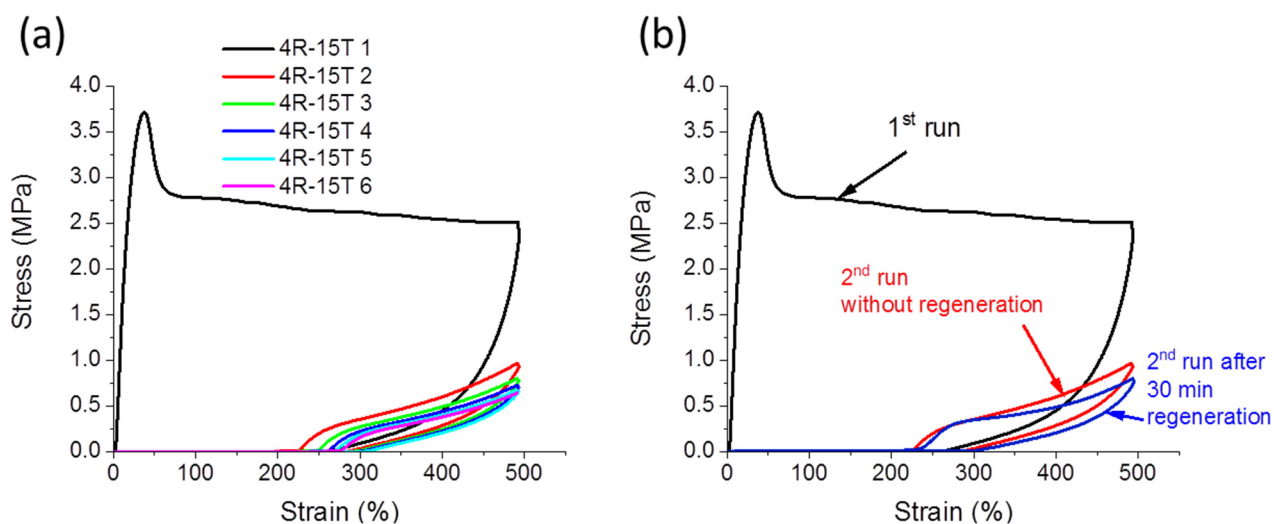

**SI-Figure S6:** Behaviour of the nanocomposite 4R-15T (a) upon repeated cyclic loading; (b) after a 30 min rest time following the first loading cycle.

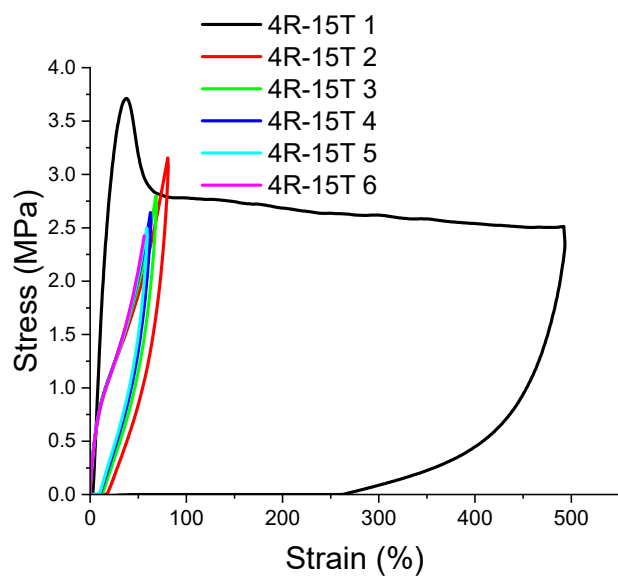

**SI-Figure S7:** Hysteresis behaviour of the nanocomposite 4R-15T upon repeated cyclic loading with evaluation of each cycle as a new specimen with a new initial geometry.



## Relaxation tests

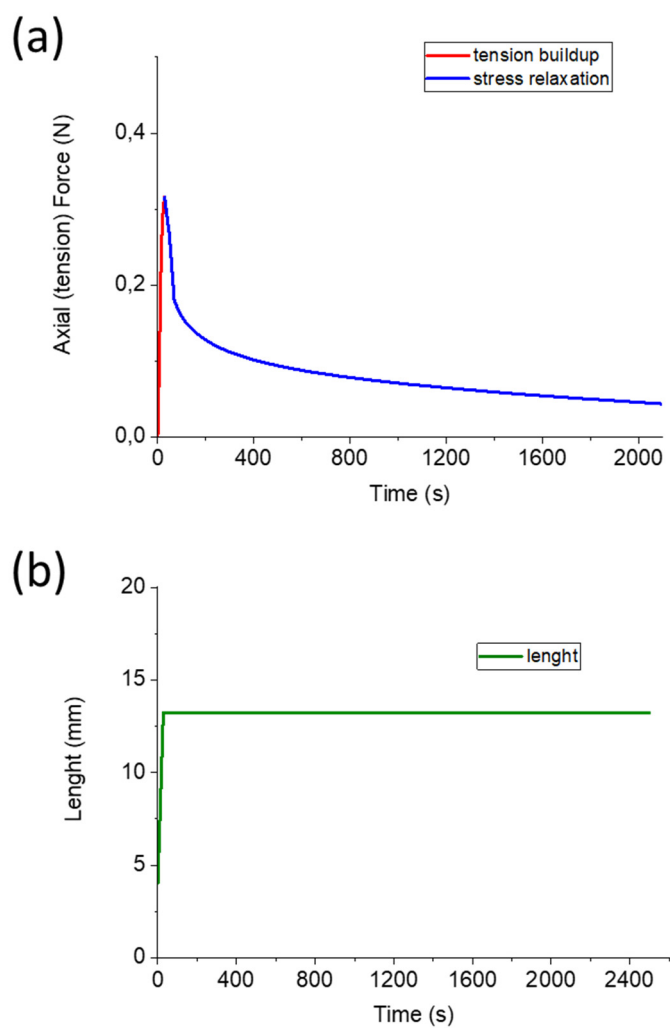

**SI-Figure S8:** Neat polyMEA: Stress relaxation experiment: (a) graph of stress build-up (as consequence of mechanical stretching, red line) and of subsequent relaxation (during the rest period, blue line); (b) length of the specimen between the clamps of the analysing machine during this experiment.

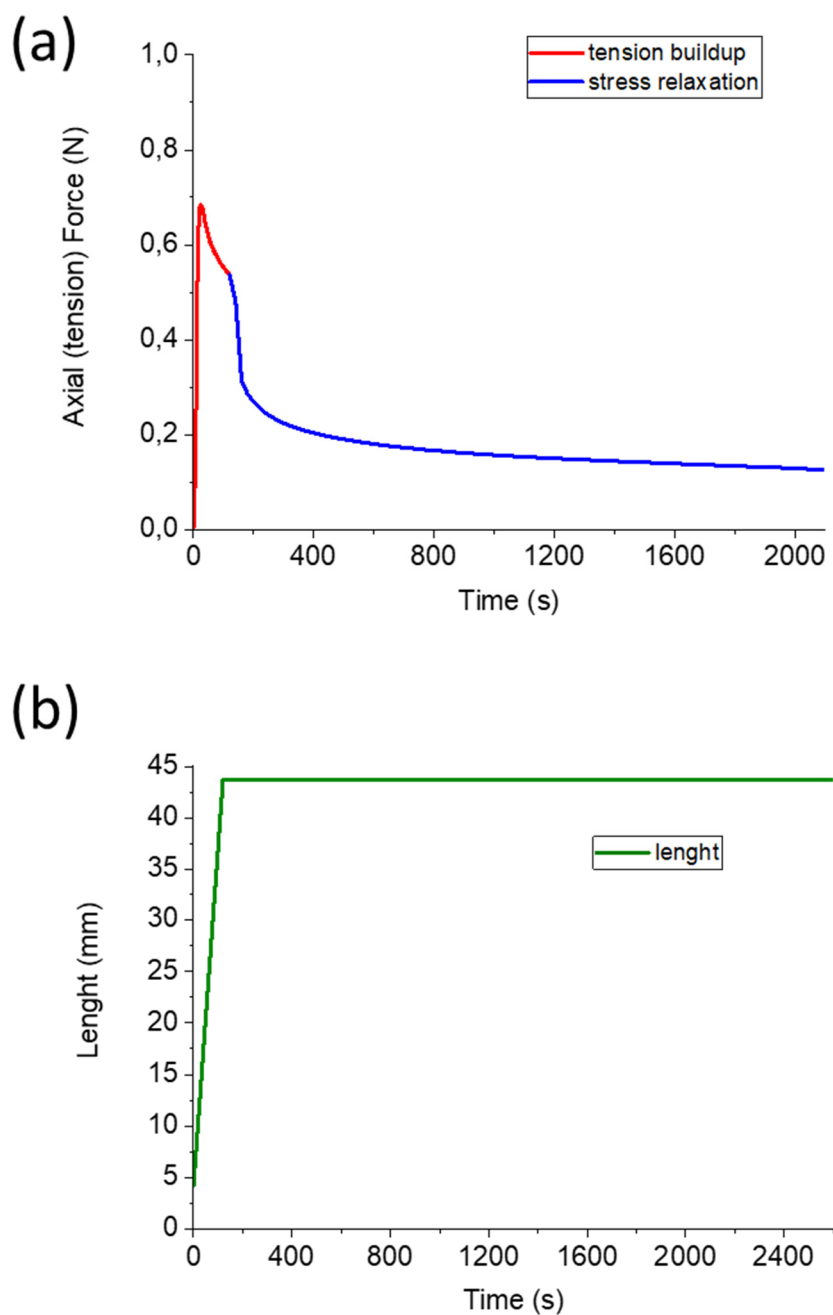

**SI-Figure S9:** 4R-0T: Stress relaxation experiment: (a) graph of stress build-up (as consequence of mechanical stretching, red line) and of subsequent relaxation (during the rest period, blue line); (b) length of the specimen between the clamps of the analysing machine during this experiment.



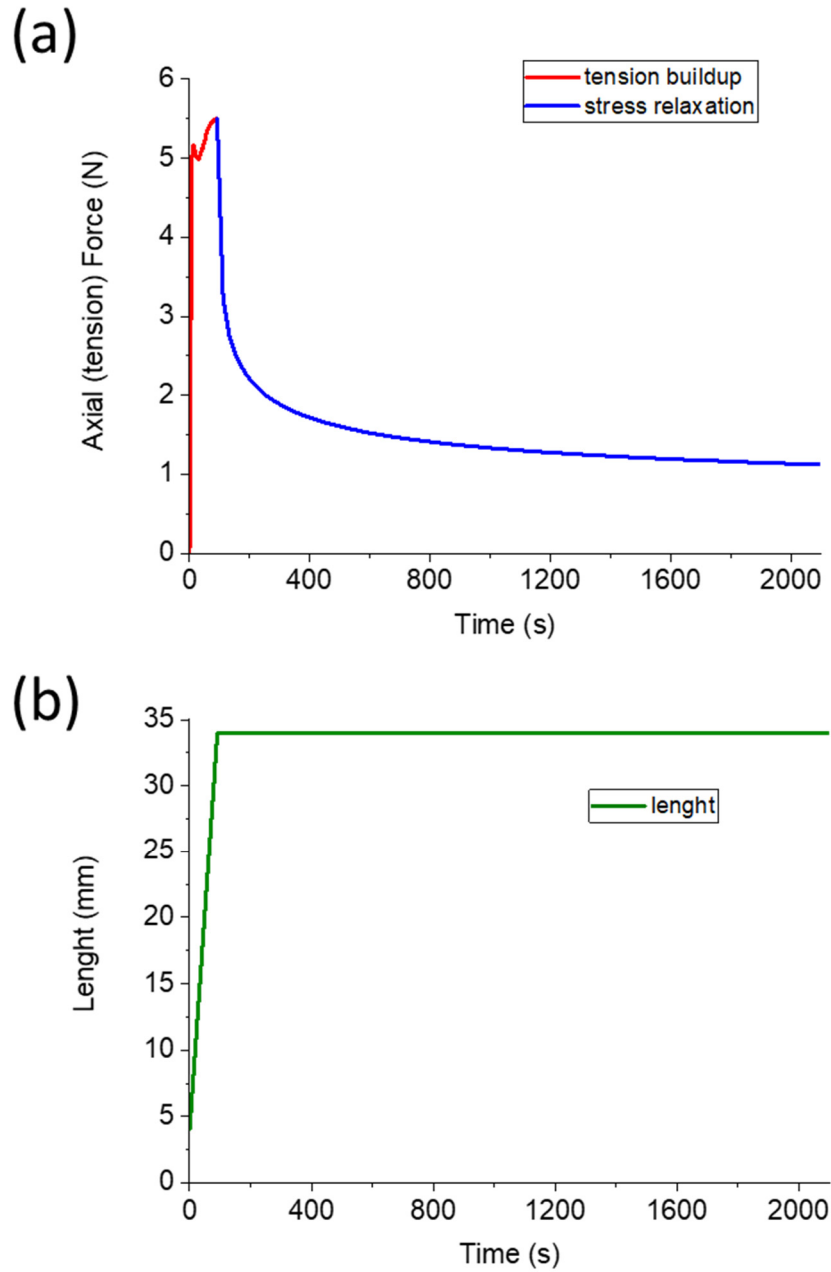

**SI-Figure S10:** 0R-15T: Stress relaxation experiment: (a) graph of stress build-up (as consequence of mechanical stretching, red line) and of subsequent relaxation (during the rest period, blue line); (b) length of the specimen between the clamps of the analysing machine during this experiment.

### 3. Changes after enduring very large deformations

#### Tensile tests after enduring deformation until disruption

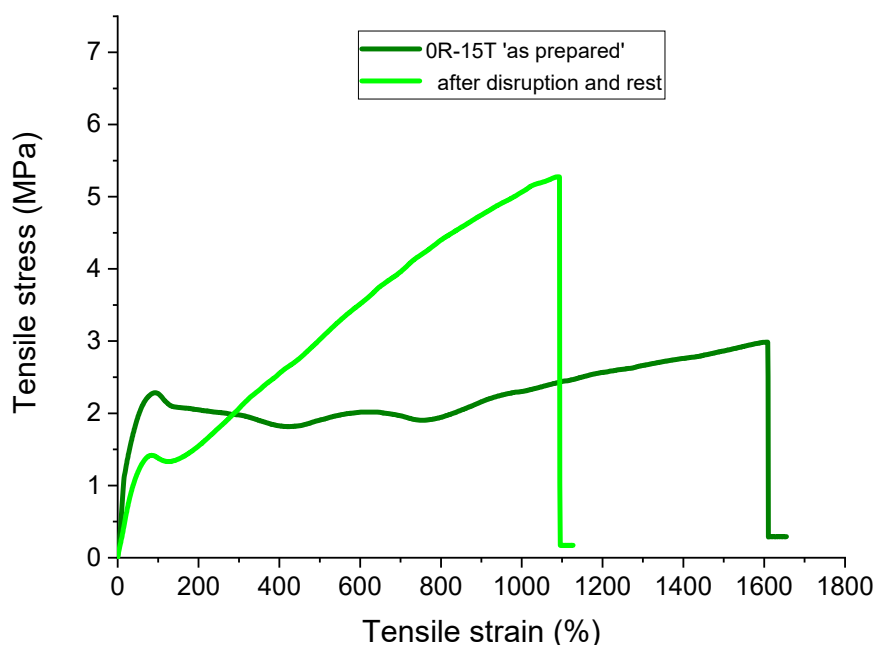

**SI-Figure S11:** 0R-15T: successive tensile tests until disruption, first with an ‘as prepared’ sample, thereafter with one of the ‘stretching-treated’ pieces obtained by the disruption after 4 months of rest preceding the second test.

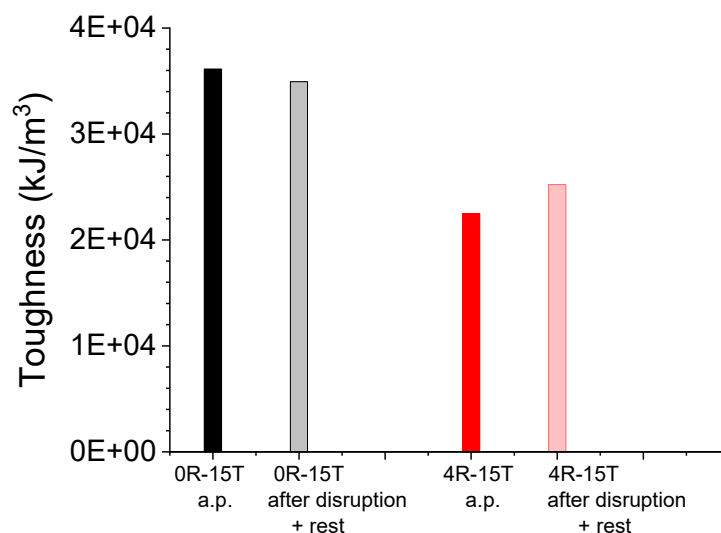

**SI-Figure S12:** 0R-15T and 4R-15T: tensile toughness values of the nanocomposites in the ‘as prepared’ state (label “a.p.”), and after destructive stretching and subsequent rest time of 4 months (label “after disruption + rest”).



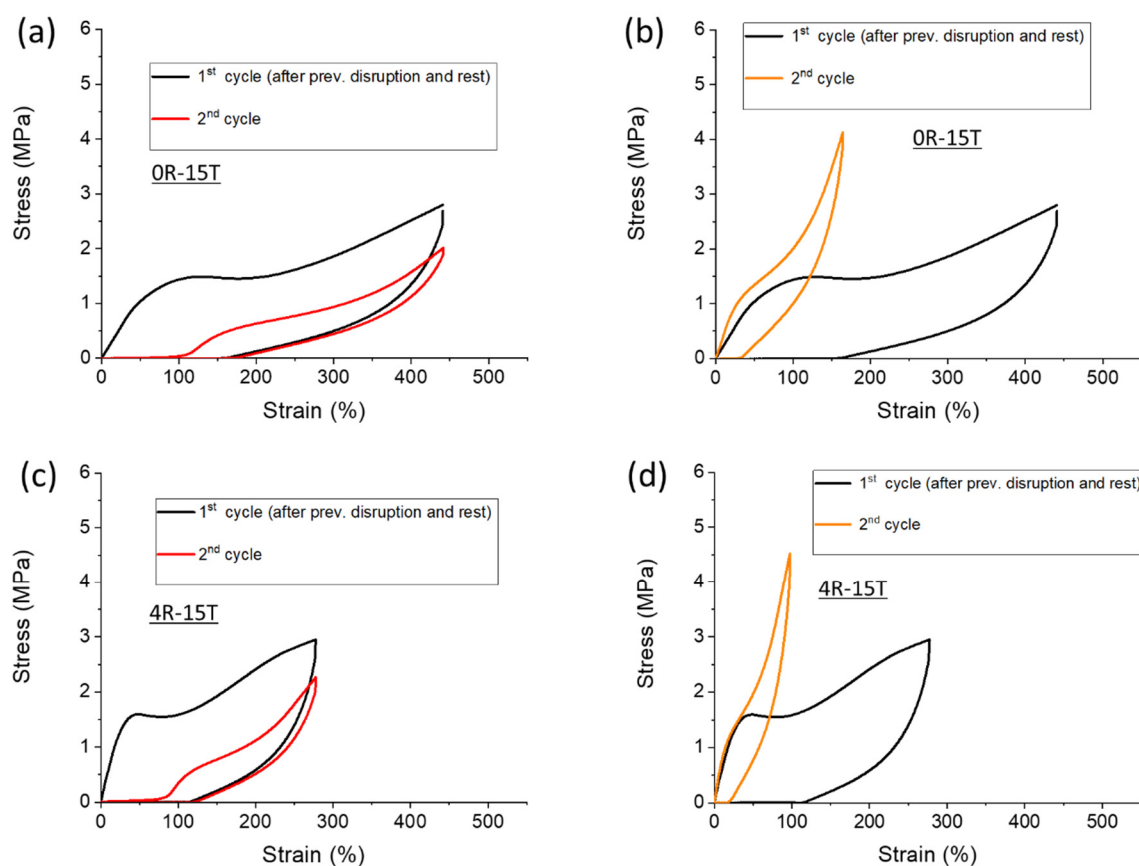

**SI-Figure S13:** Hysteresis curves up to large deformations of the silica-filled nanocomposites which underwent previous stretching until disruption, as well as a period of subsequent rest: (a, b) polyMEA / 15% SiO<sub>2</sub>; and (c, d) polyMEA / 4% clay / 15% SiO<sub>2</sub>: ‘normal’ depiction in engineering mode – second cycle evaluated using original geometry prior to first cycle (a, c); as well as evaluation of the second cycles as new specimens with new initial geometry (b, d).

## TEM analysis of morphology changes

**SI-Figure S14 – multi-page:**

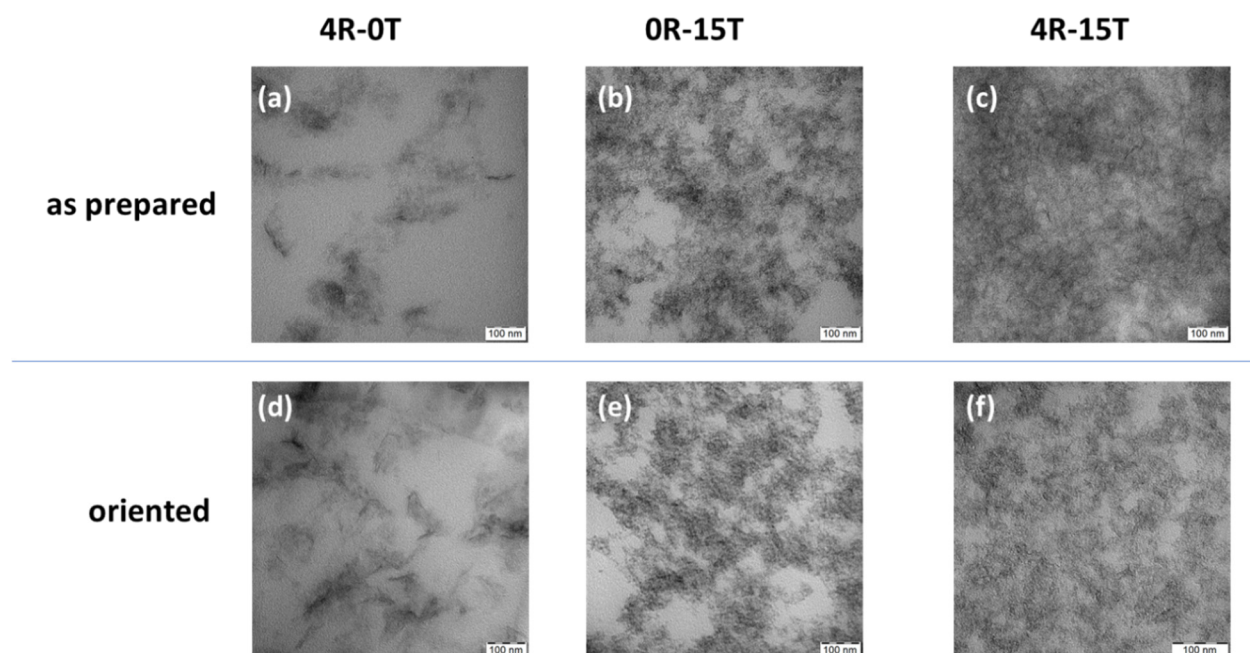

**SI-Figure S14 – multi-page: Overview:** Effect of the endured very extensive stretching (until disruption) on the morphology (TEM) of the most important nanocomposite samples (scalebar: 100 nm): (a-c) morphology in the ‘as prepared’ state; (d-f) morphology after a endured elongation until rupture – the elongation axis was in the image plane.



*SI-Figure S14 – multi-page (continued):*

4R-0T, as prepared, intact

**(g)**

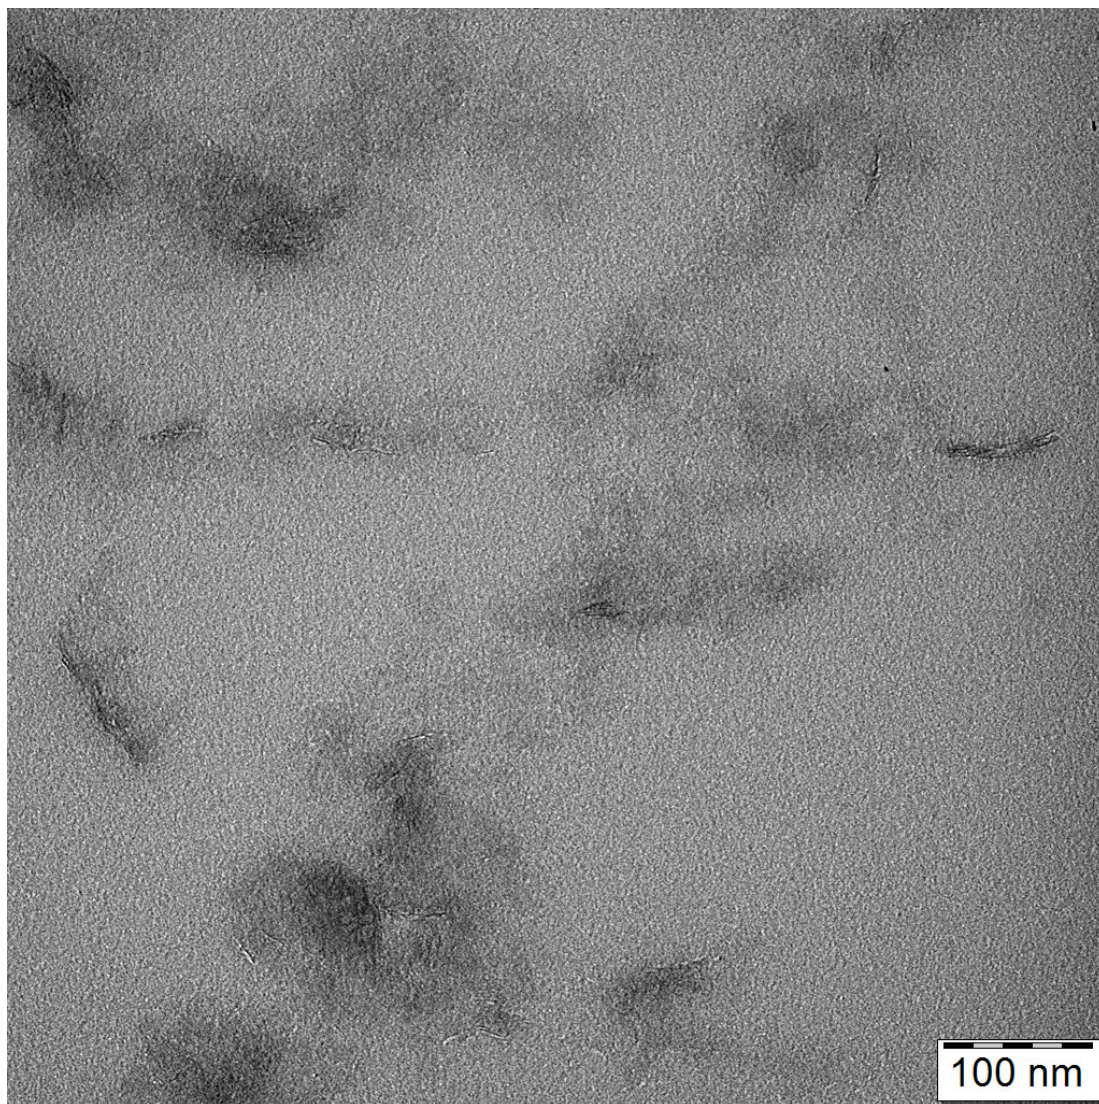

*SI-Figure S14 – multi-page (continued):* (g) High-resolution TEM image of 4R-0T, 'as prepared', intact.



*SI-Figure S14 – multi-page (continued):*

0R-15T, as prepared, intact

**(h)**

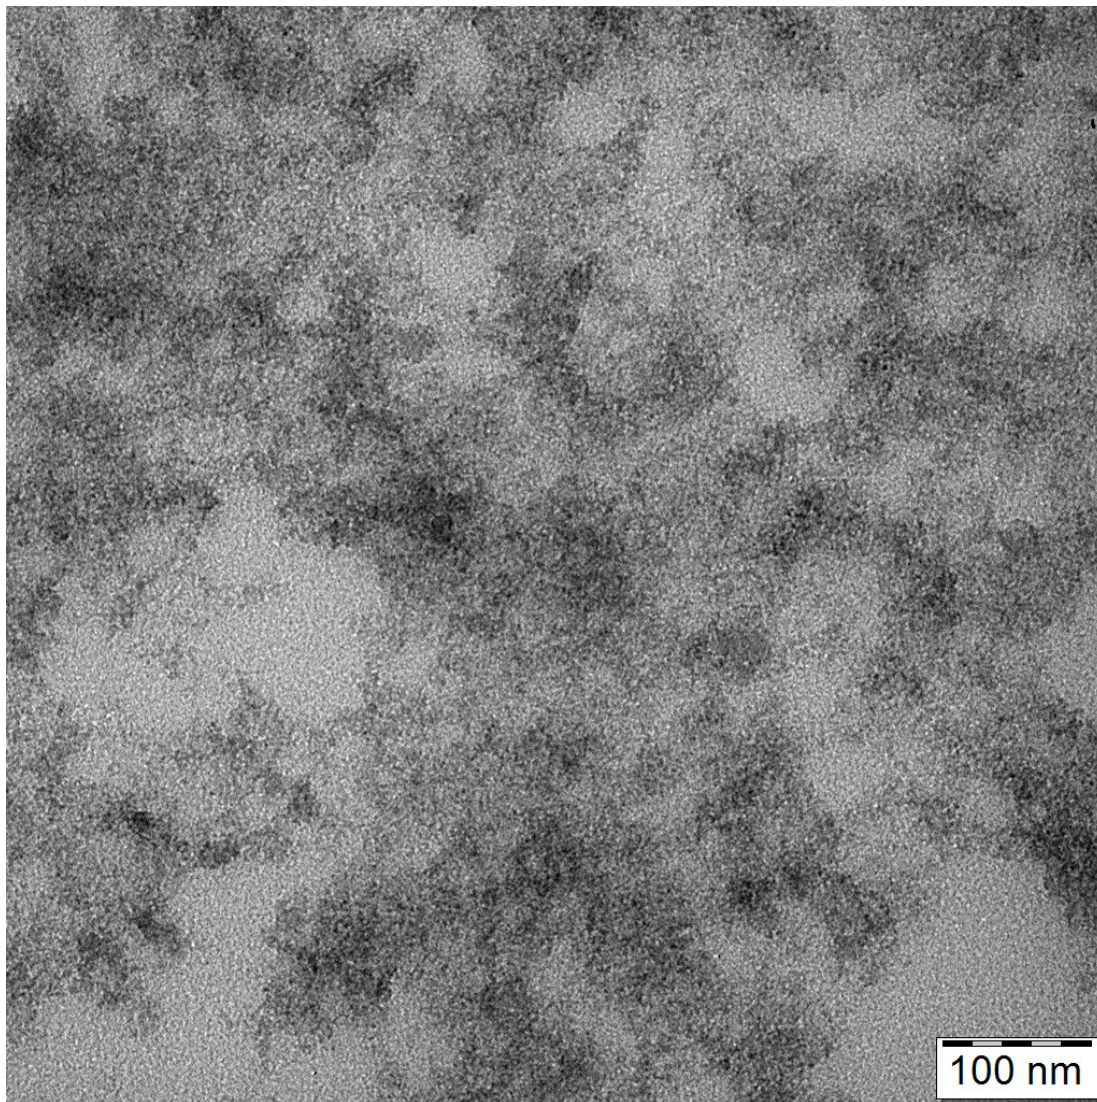

*SI-Figure S14 – multi-page (continued):* (h) High-resolution TEM image of 0R-15T, 'as prepared', intact.



***SI-Figure S14 – multi-page (continued):***

4R-15T, as prepared, intact

**(i)**

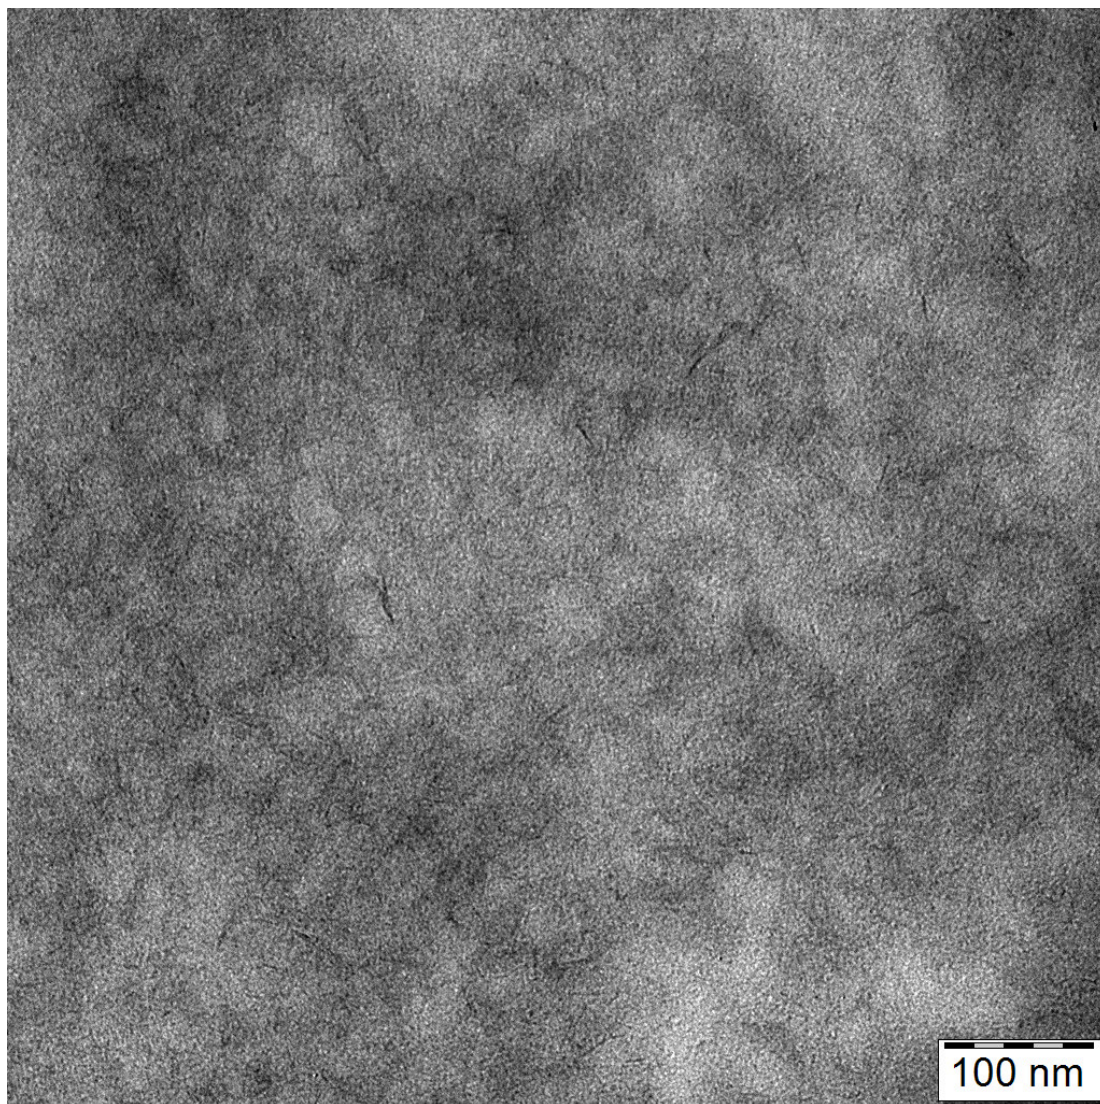

***SI-Figure S14 – multi-page (continued):*** (i) High-resolution TEM image of 4R-15T, as prepared, intact.



*SI-Figure S14 – multi-page (continued):*

4R-0T, after stretching until disruption

(j)

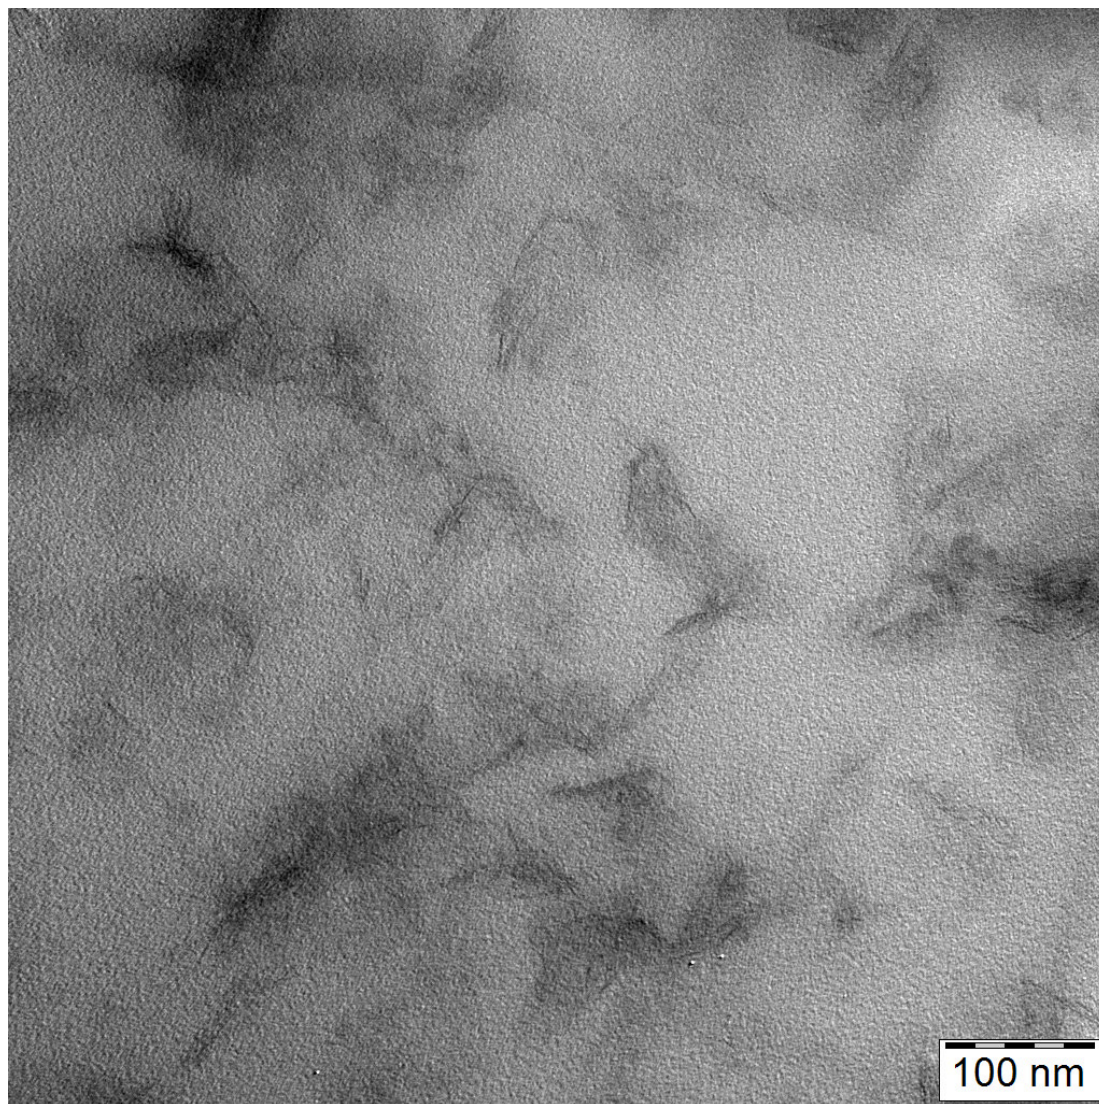

*SI-Figure S14 – multi-page (continued): (j) High-resolution TEM image of 4R-0T after stretching until disruption – the elongation axis was in the image plane.*

*SI-Figure S14 – multi-page (continued):*

0R-15T, after stretching until disruption

**(k)**

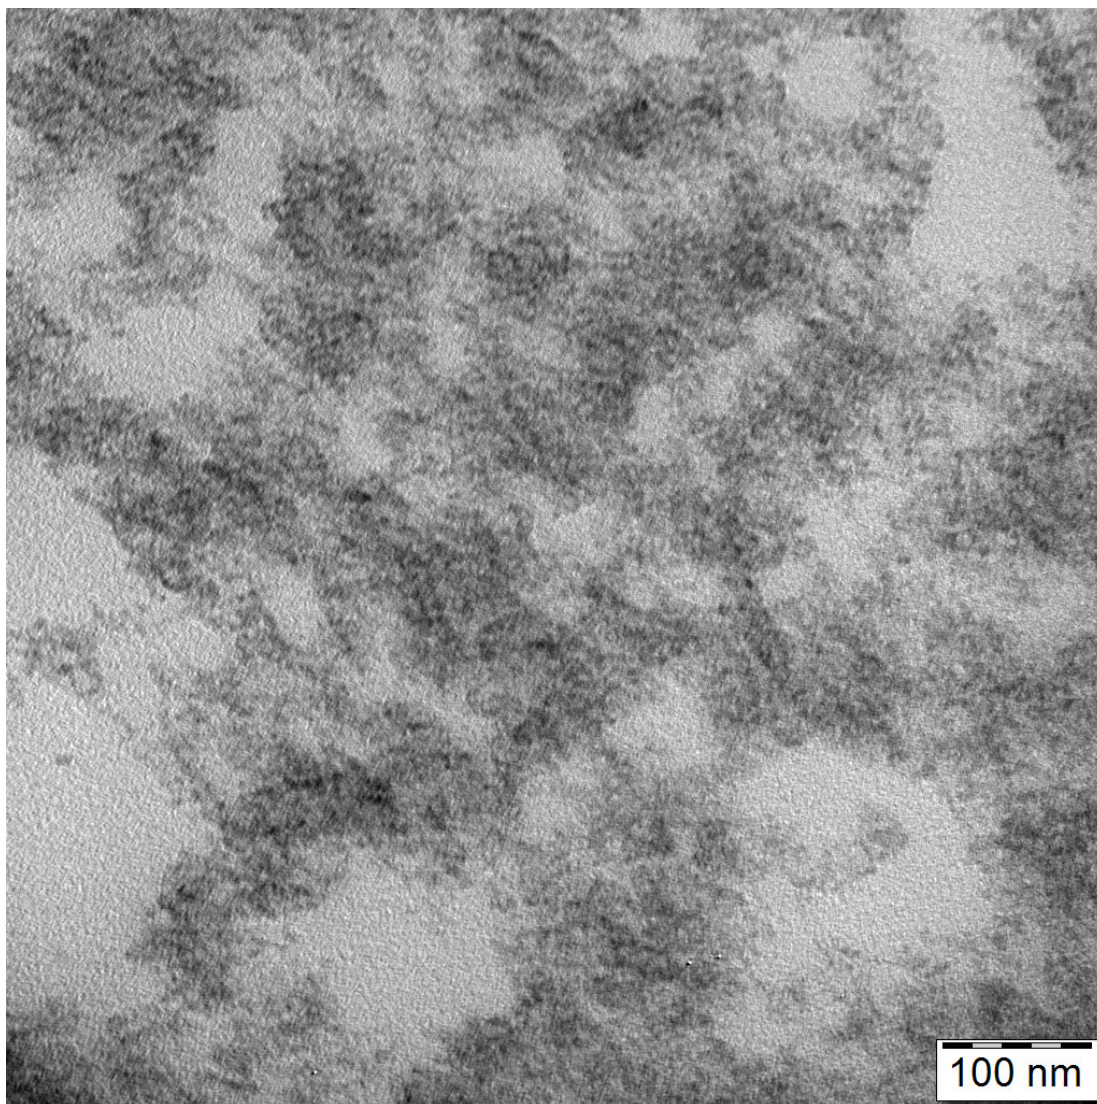

*SI-Figure S14 – multi-page (continued): (k) High-resolution TEM image of 0R-15T after stretching until disruption – the elongation axis was in the image plane.*



*SI-Figure S14 – multi-page (continued, last image):*

4R-15T, after stretching until disruption

(l)

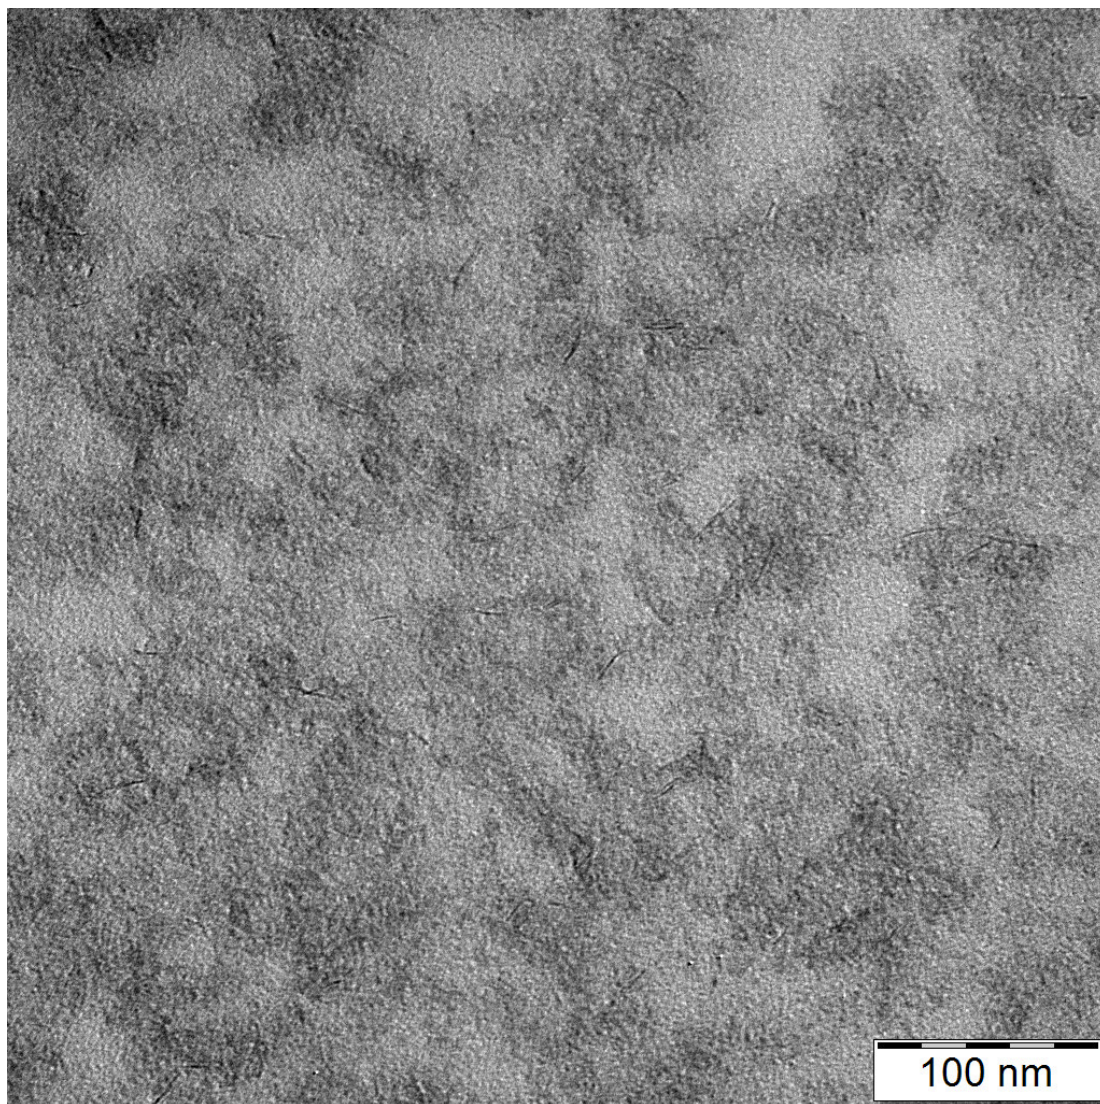

*SI-Figure S14 – multi-page (continued, last image):* (l) High-resolution TEM image of 4R-15T after stretching until disruption – the elongation axis was in the image plane.

## X-ray scattering analysis of morphology changes

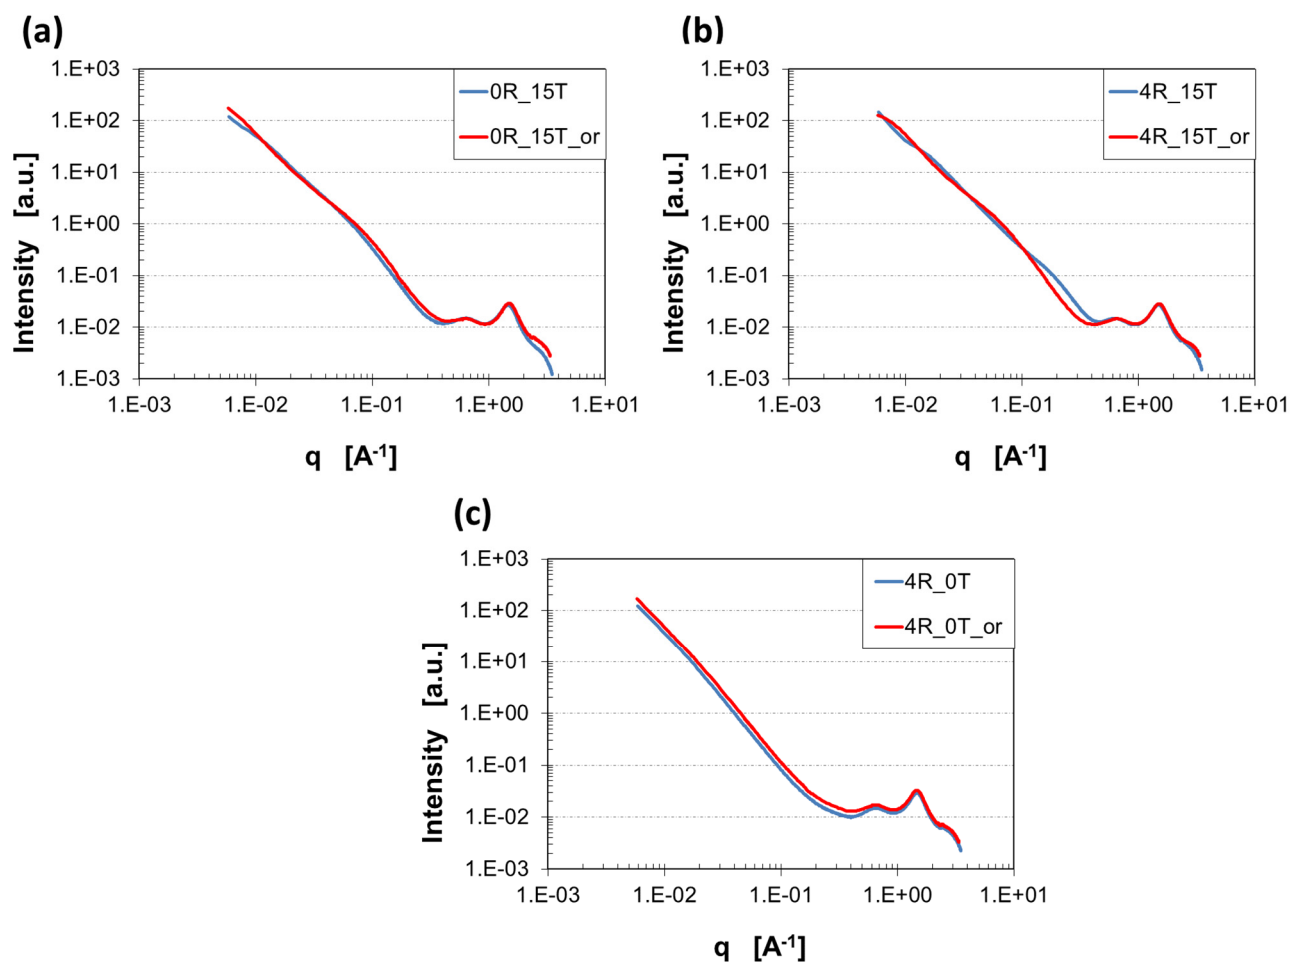

**SI-Figure S15:** Effect of previous elongation until destruction on some of the X-ray diffraction patterns of the most important among the studied elastomers: (a) sample with 15 wt.% of nano-SiO<sub>2</sub>

## 2-dimensional X-ray diffractograms before and after disruption test

*SI-Figure S16 – multi-page:*

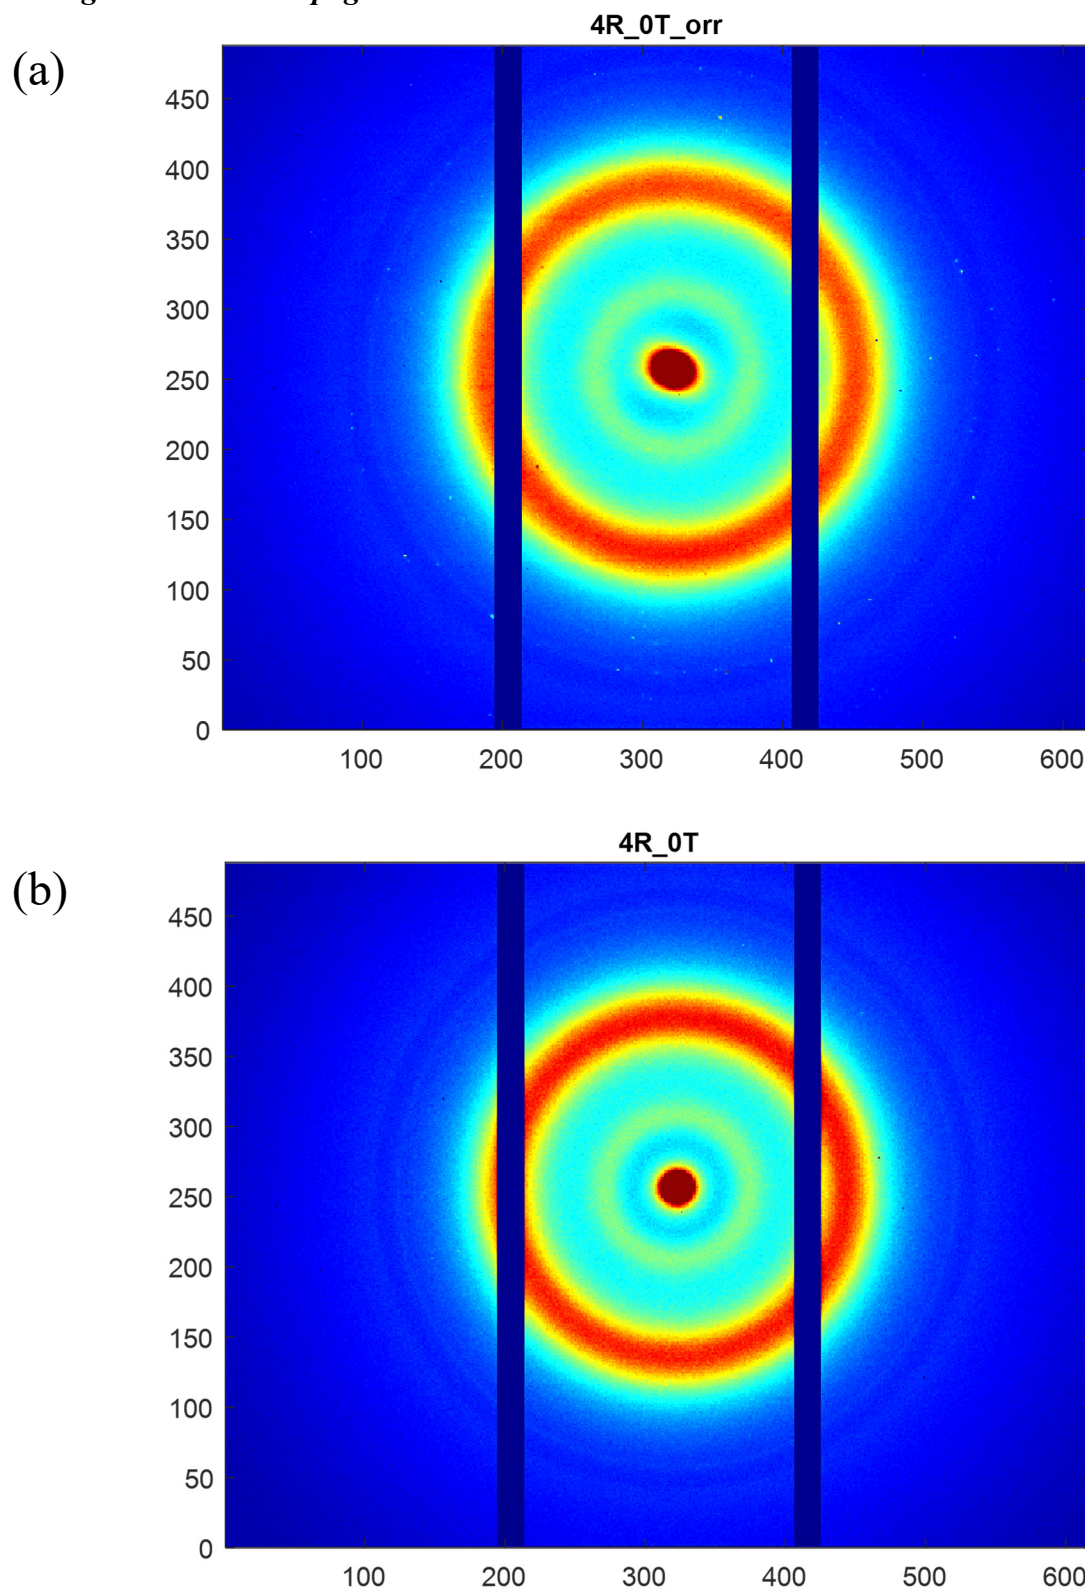

**SI-Figure S16 – multi-page:** 2D diffractograms of the nanocomposite 4R-0T (4 wt.% of clay as the exclusive filler): (a) in partly aligned state ca. 30 min after tensile test until disruption; (b) in the intact 'as prepared' state.



**SI-Figure S16 – multi-page (continued):**

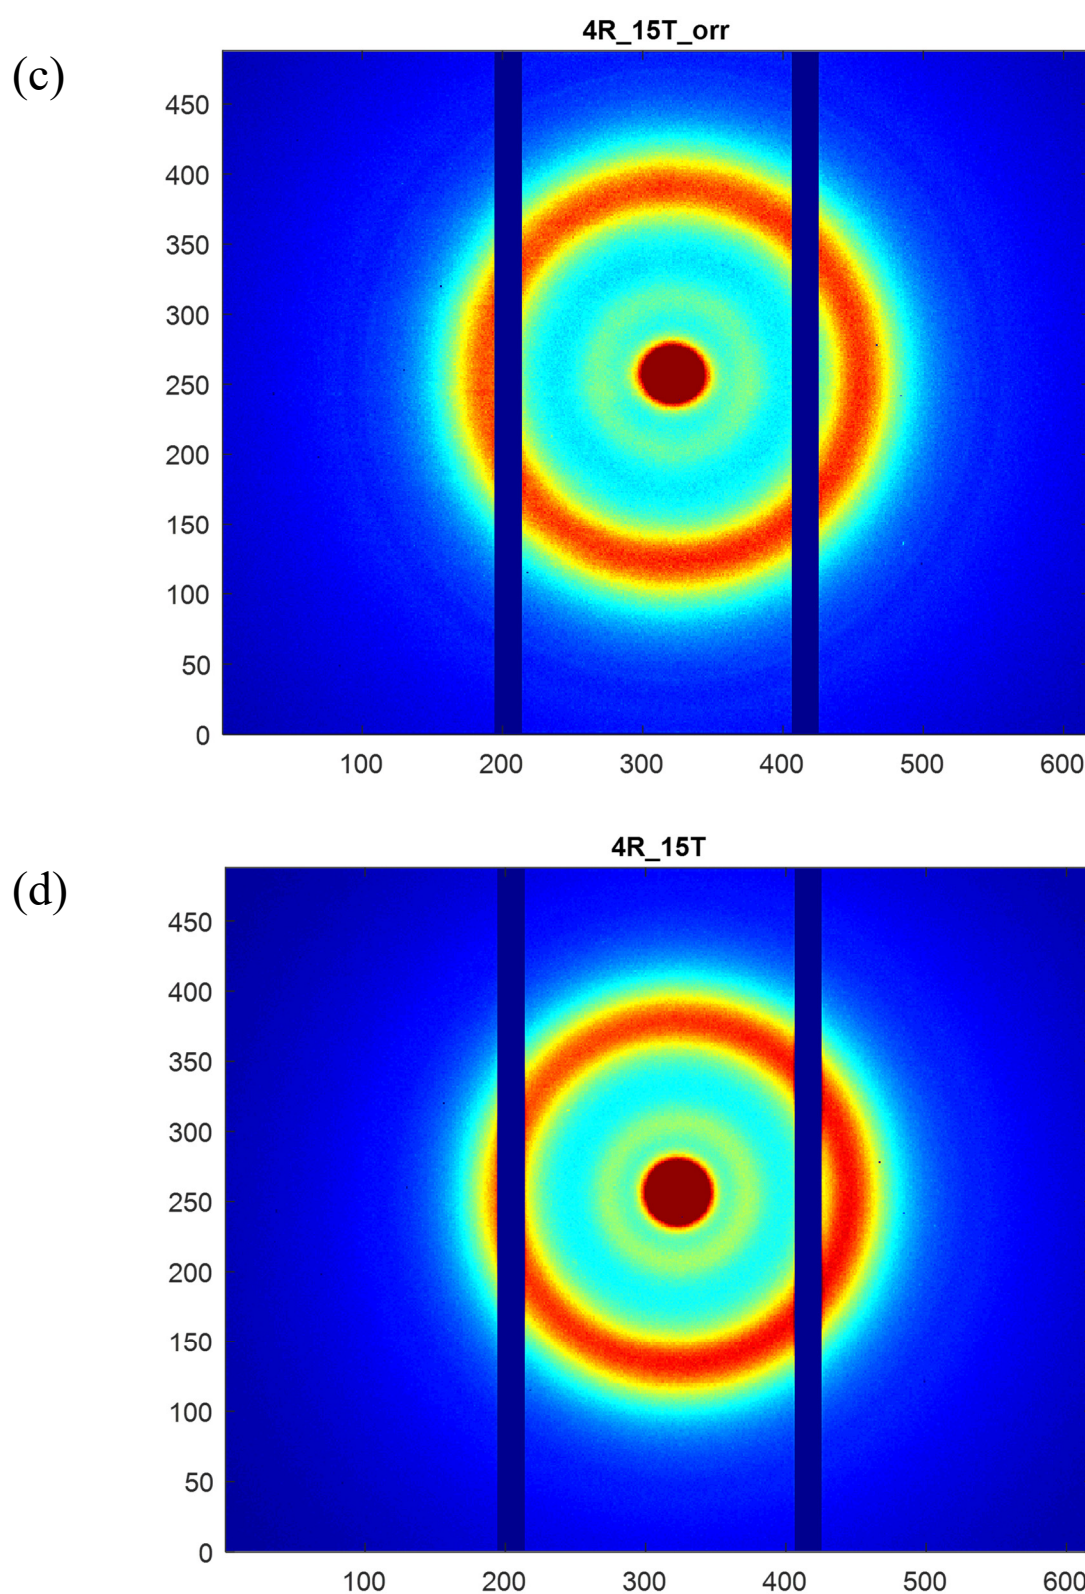

**SI-Figure S16 – multi-page (continued):** 2D diffractograms of the nanocomposite 4R-15T (4 wt.% of clay + 15 wt.% of silica): (c) in slightly anisotropic state ca. 30 min after tensile test until disruption; (d) in the intact 'as prepared' state.

**SI-Figure S16 – multi-page (continued):**

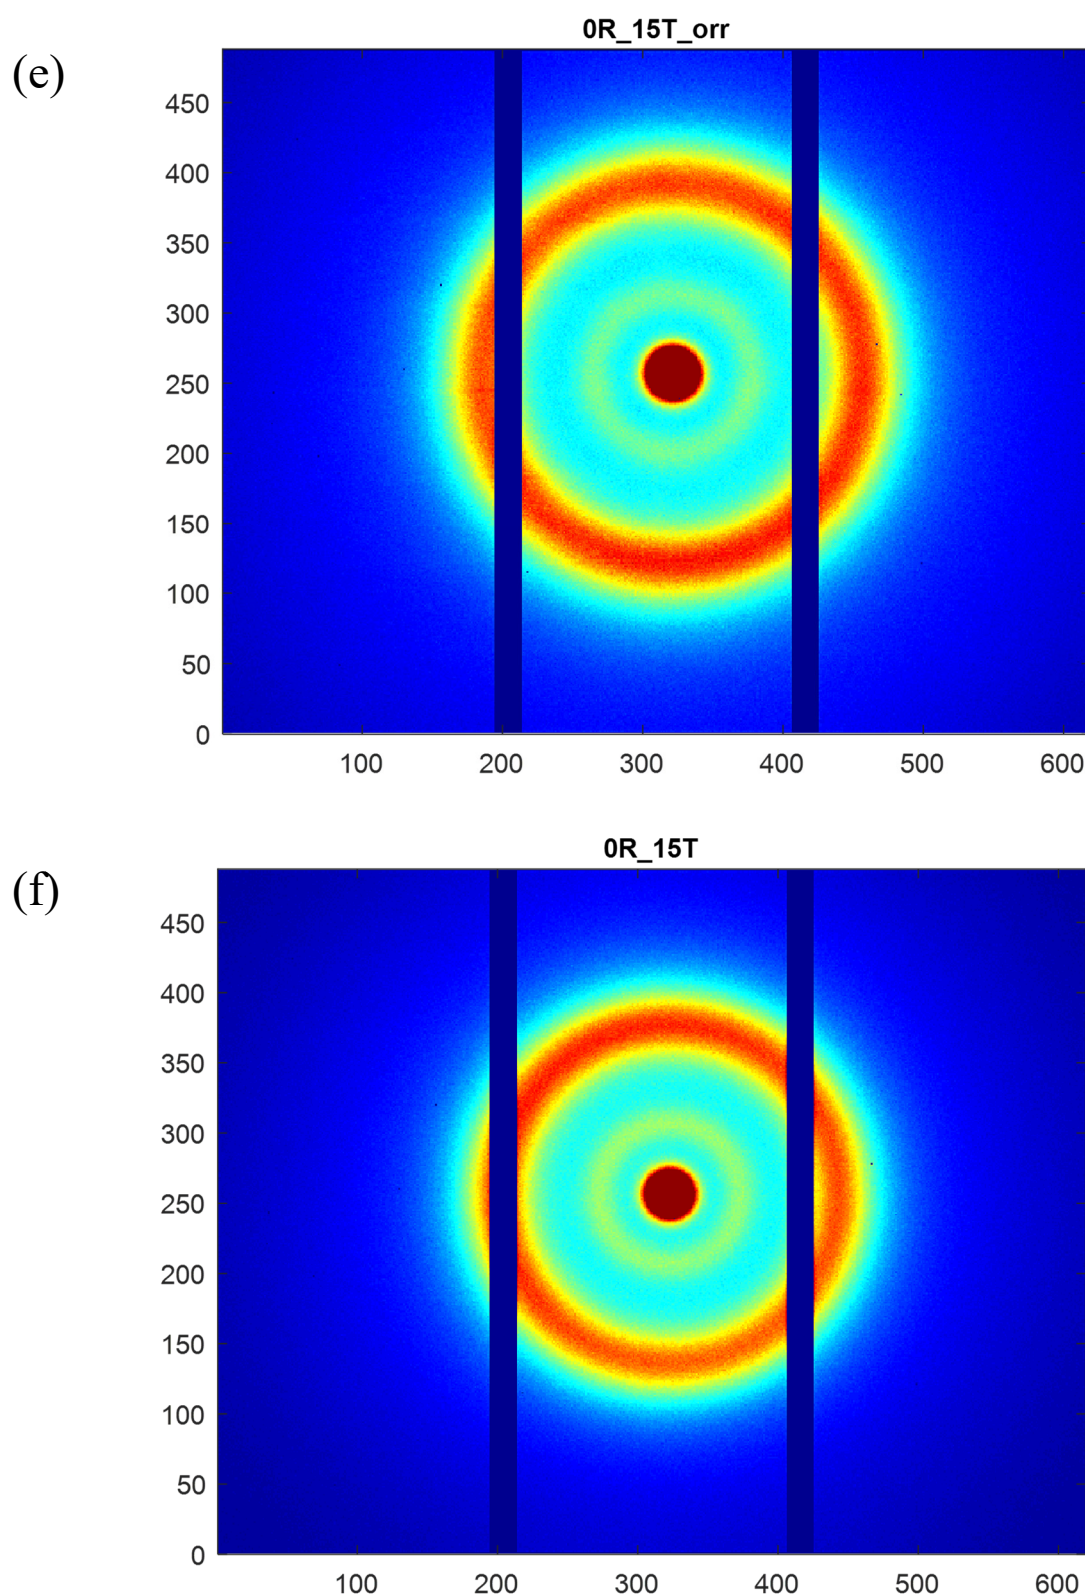

**SI-Figure S16 – multi-page (continued):** 2D diffractograms of the nanocomposite 0R-15T (15 wt.% of silica as exclusive filler): (e) in isotropic, non-oriented state ca. 30 min after tensile test until disruption; (f) in the intact 'as prepared' state.

***SI-Figure S16 – multi-page (continued, last image):***

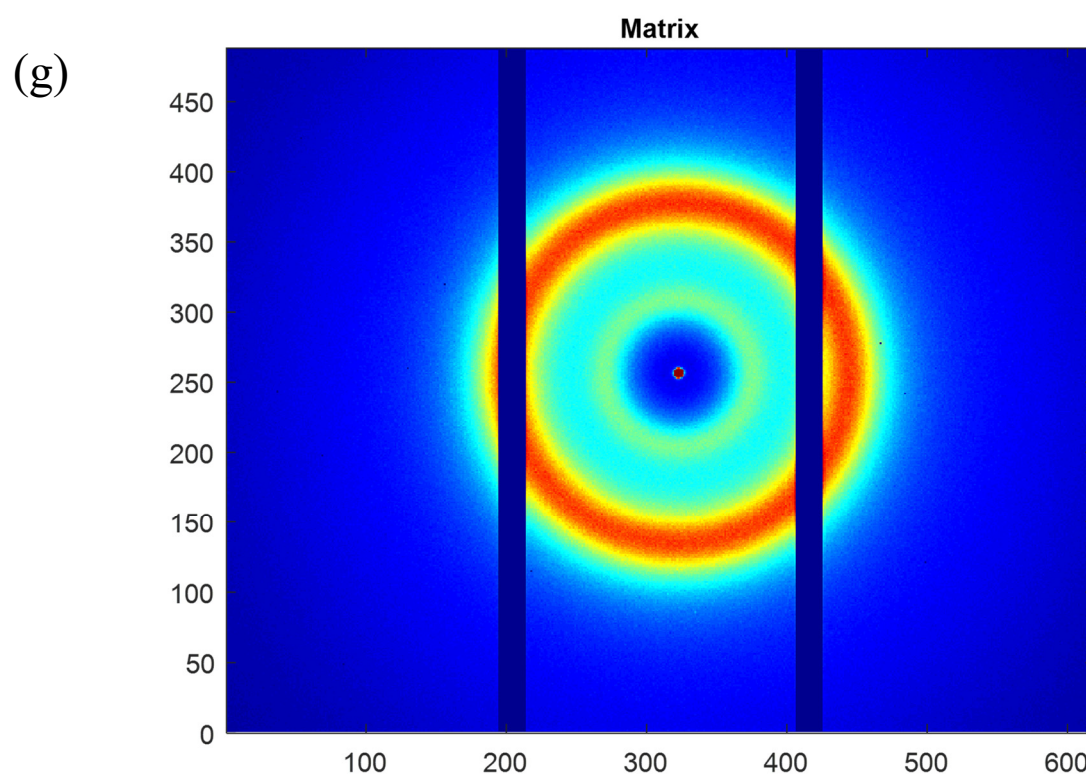

***SI-Figure S16 – multi-page (continued, last image):*** (g) 2D diffractogram of neat polyMEA in the ‘as prepared’ state (as reference).



## 4. Thermal properties (DSC)

*SI-Figure S17 – multi-page:*

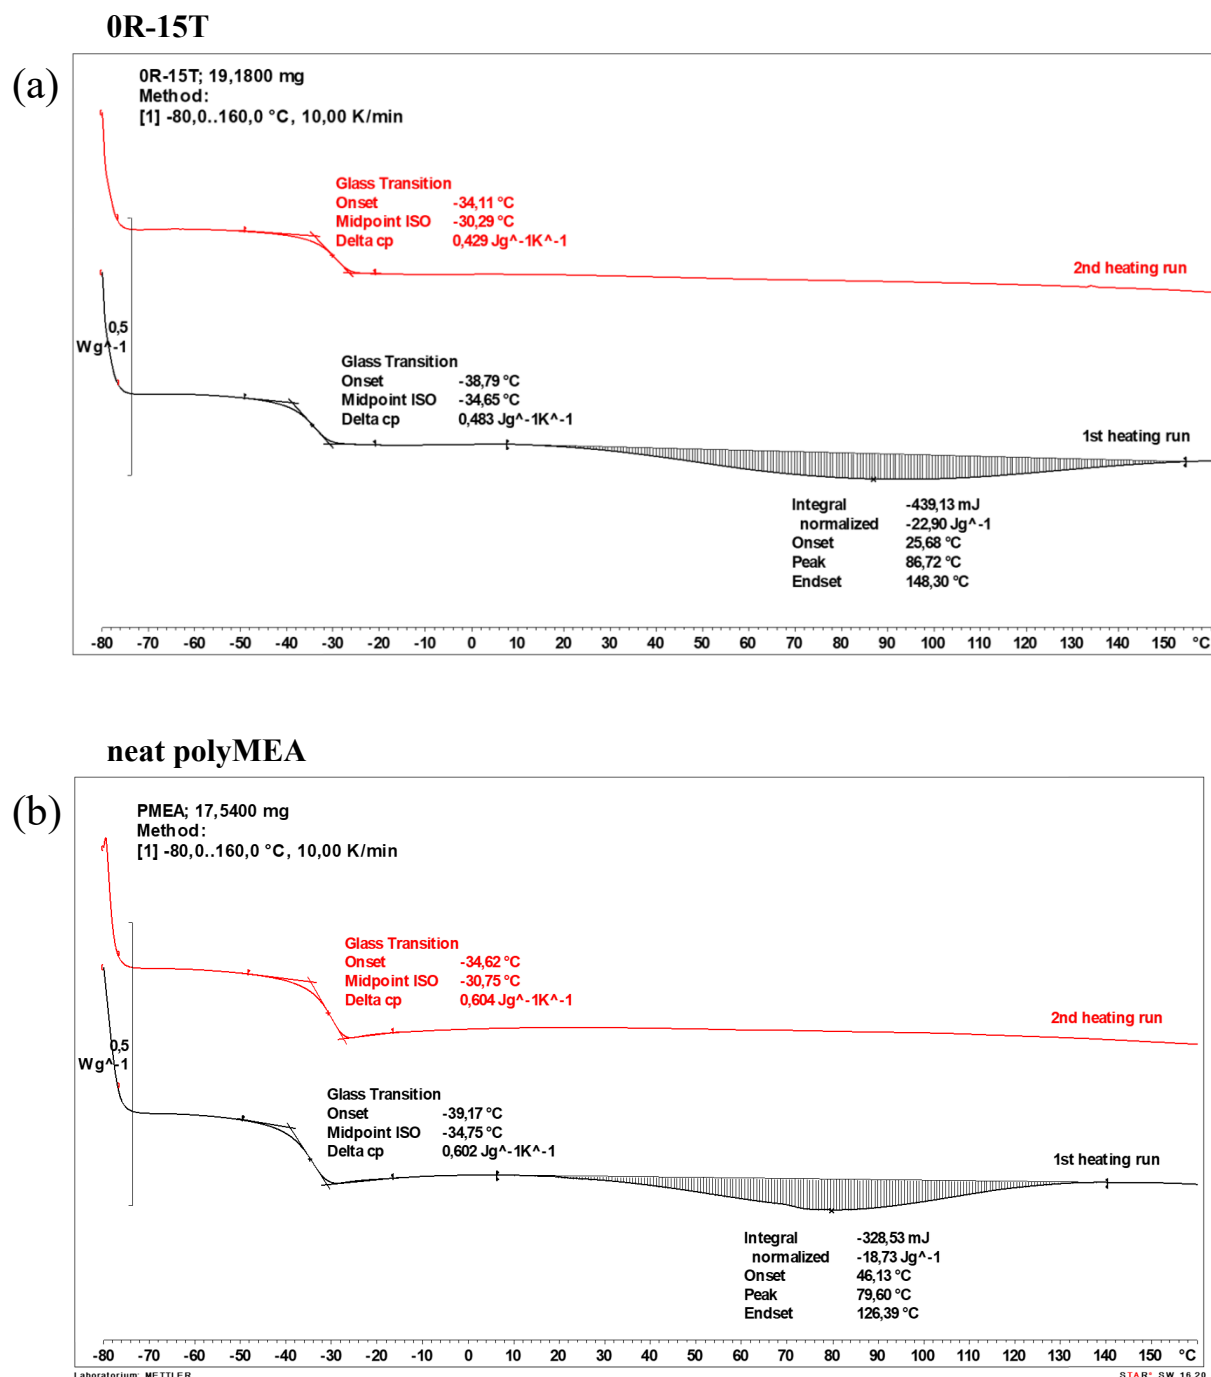

*SI-Figure S17 – multi-page:* DSC trace of (a) 0R-15T (polyMEA with 15 wt.% of nano-SiO<sub>2</sub>); (b) neat polyMEA matrix.

**SI-Figure S17 – multi-page (continued):**

**4R-0T**

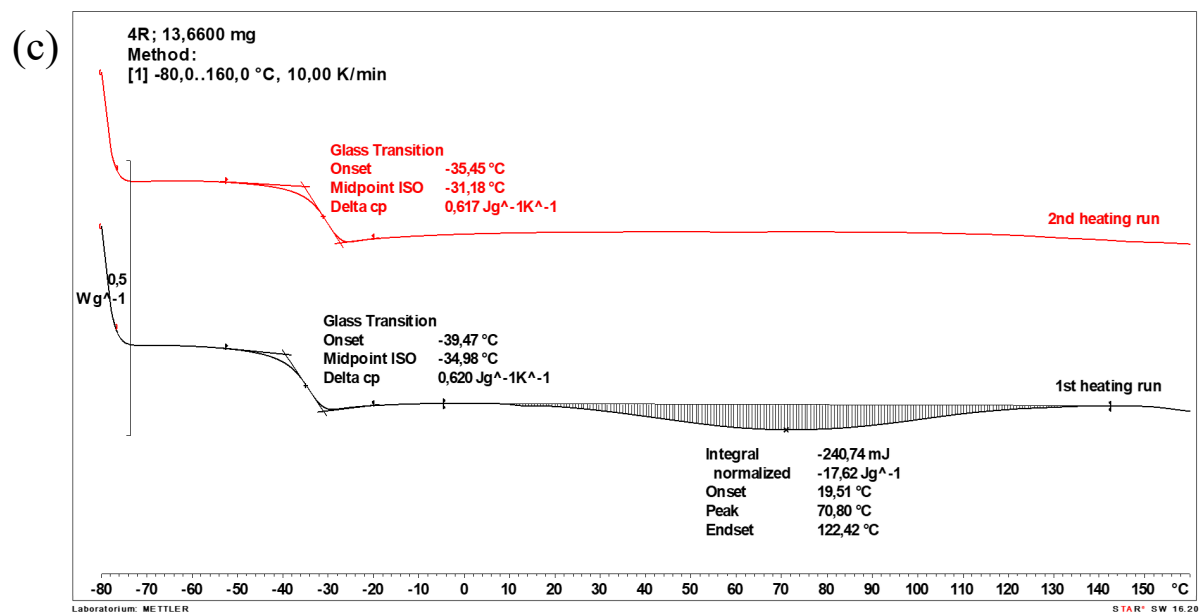

**10R-0T**

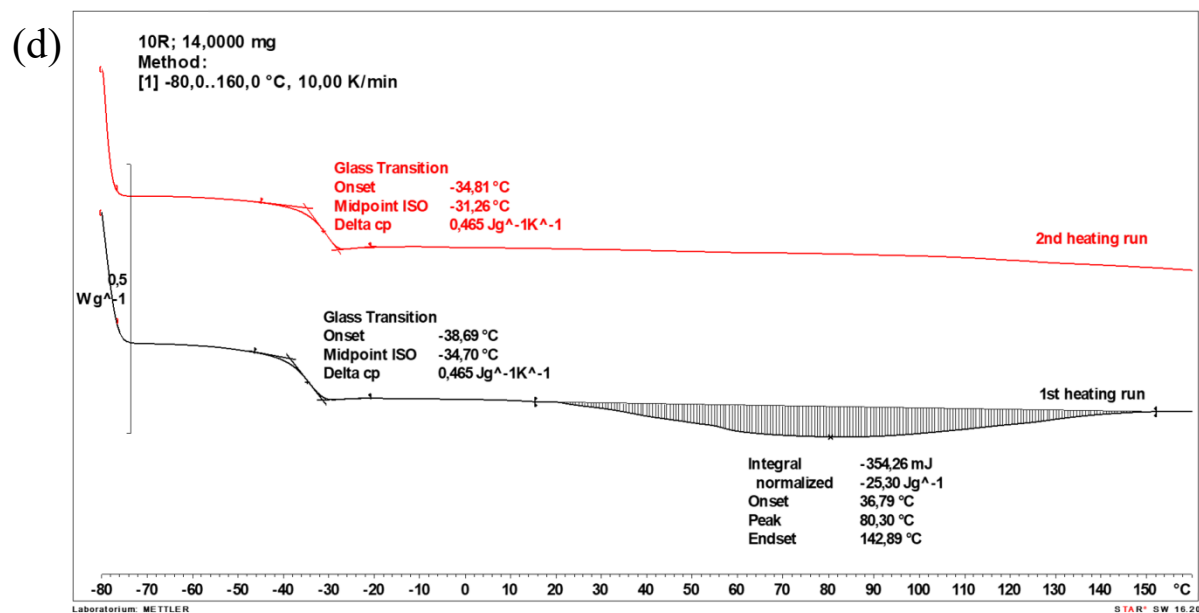

**SI-Figure S17 – multi-page:** DSC trace of (c) 4R-0T (polyMEA with 4 wt.% of clay);  
(d) 10R-0T (polyMEA with 10 wt.% of clay).

**SI-Figure S17 – multi-page (continued):**

**0R-5T**

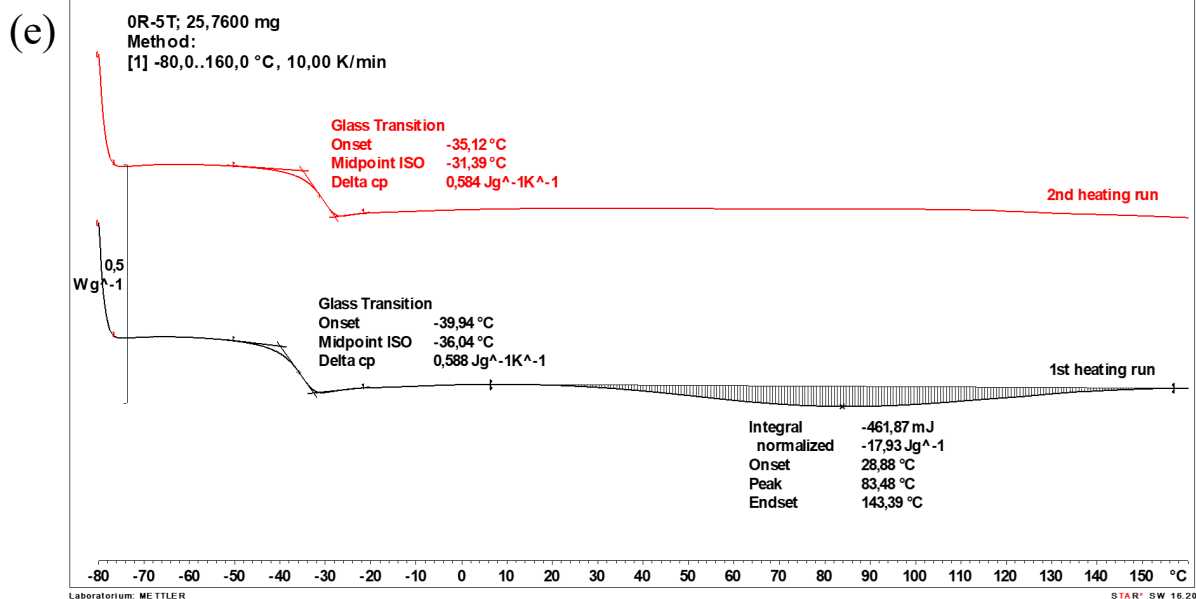

**4R-5T**

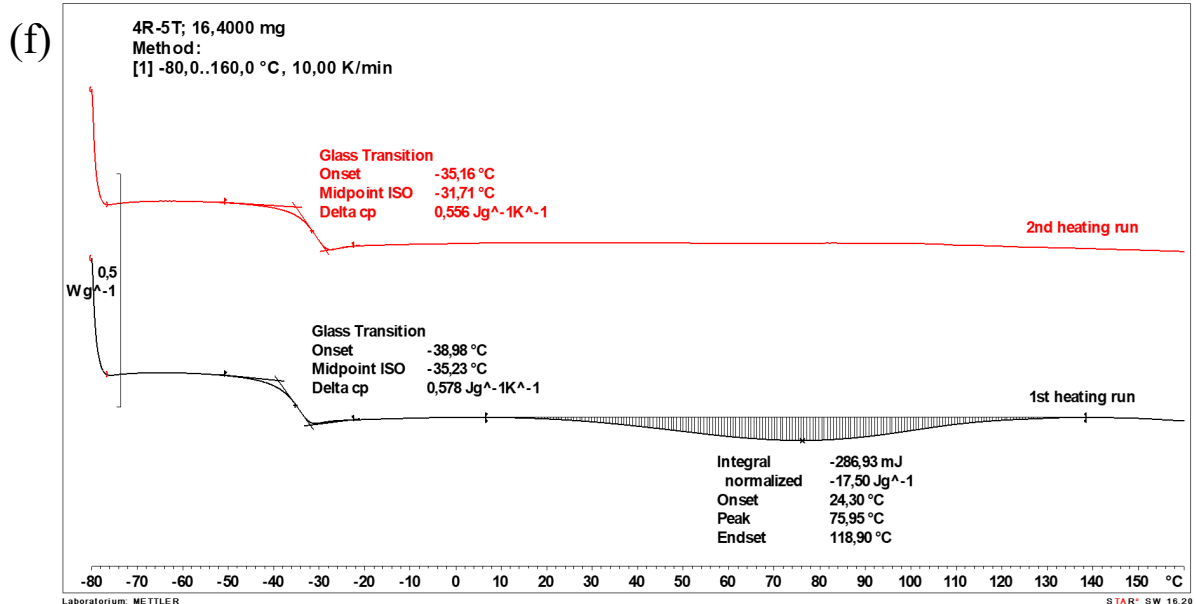

**SI-Figure S17 – multi-page:** DSC trace of (e) 0R-5T (polyMEA with 5 wt.% of nano-silica); (f) 4R-5T (polyMEA with 4 wt.% of clay and 5 wt.% of nano-silica).



**SI-Figure S17 – multi-page (continued, last image):**

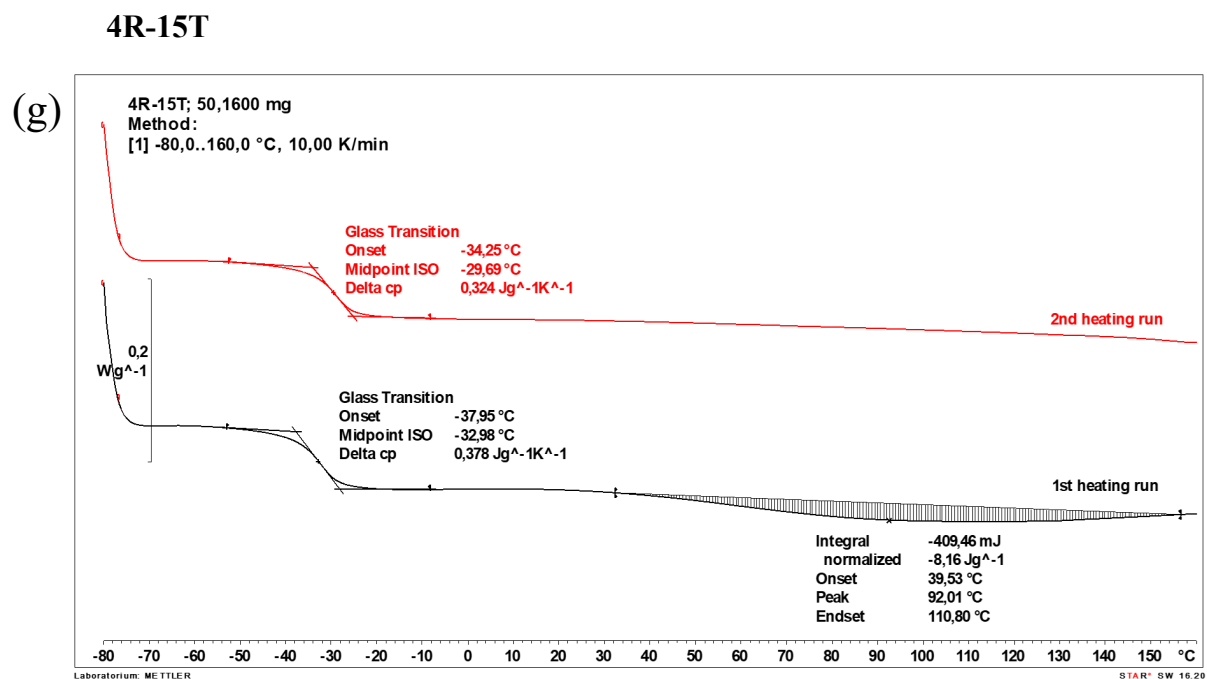

**SI-Figure S17: – multi-page (continued, last image):** (g) DSC trace of 4R-15T (polyMEA with 4 wt.% of clay and 15 wt.% of nano-silica).

## 5. Stability against oxidative and thermal degradation (TGA)

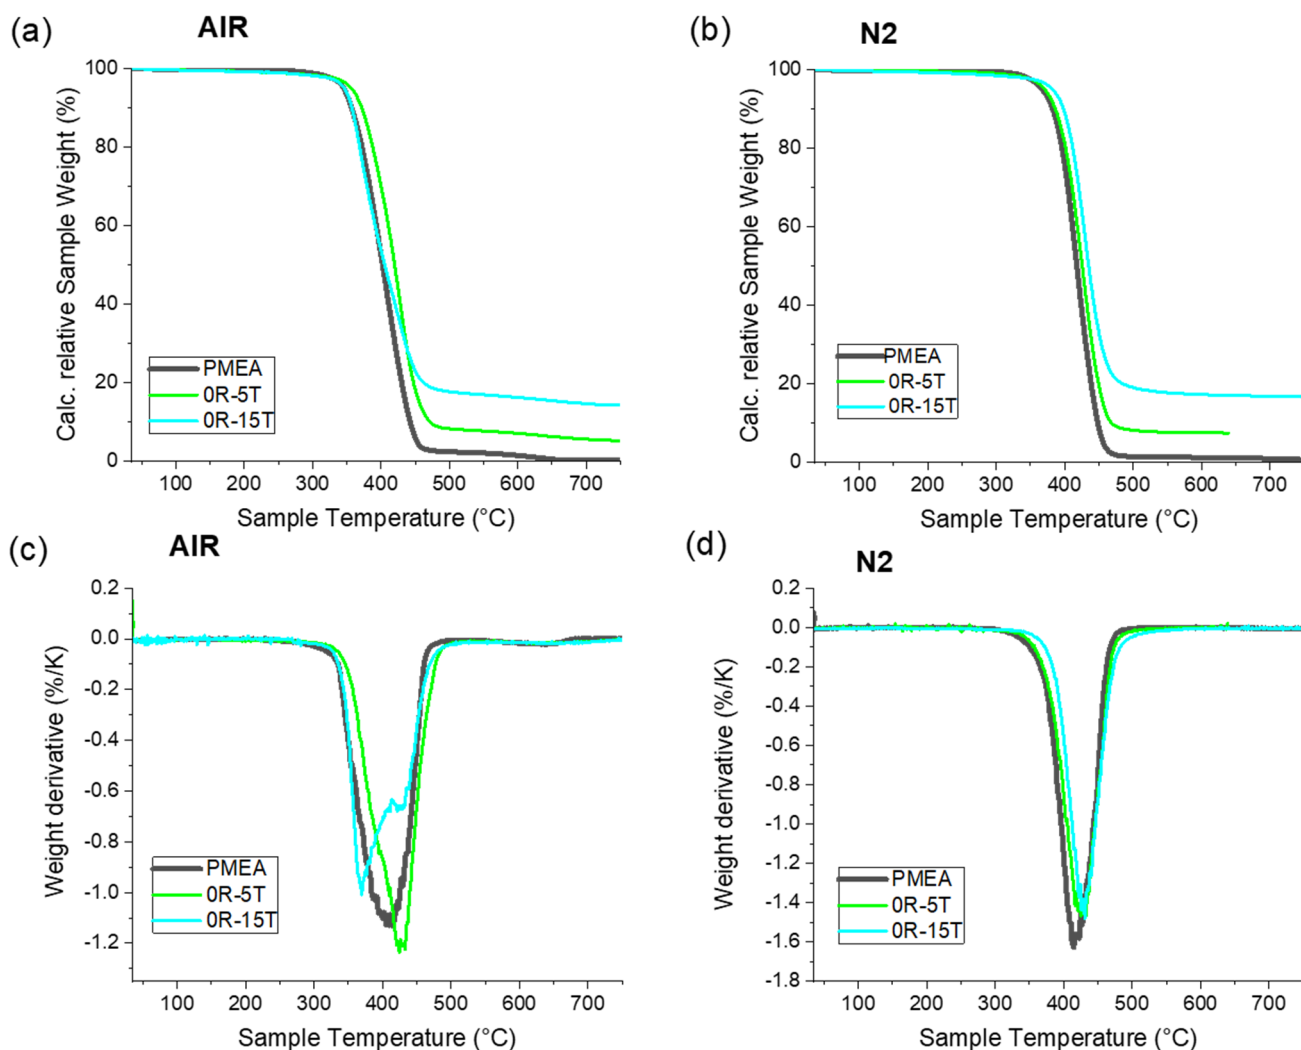

**SI-Figure S18:** TGA traces of the doubly filled polyMEA/clay/silica nanocomposite elastomers: Effect of the silica content (0, 5, 15 wt.%) in combination with 4 wt.% of clay: (a, c) in air; (b, d) in nitrogen atmosphere; (a,b) temperature-dependent relative weight; (c, d) derivative of the relative weight (dTG, decomposition peaks).

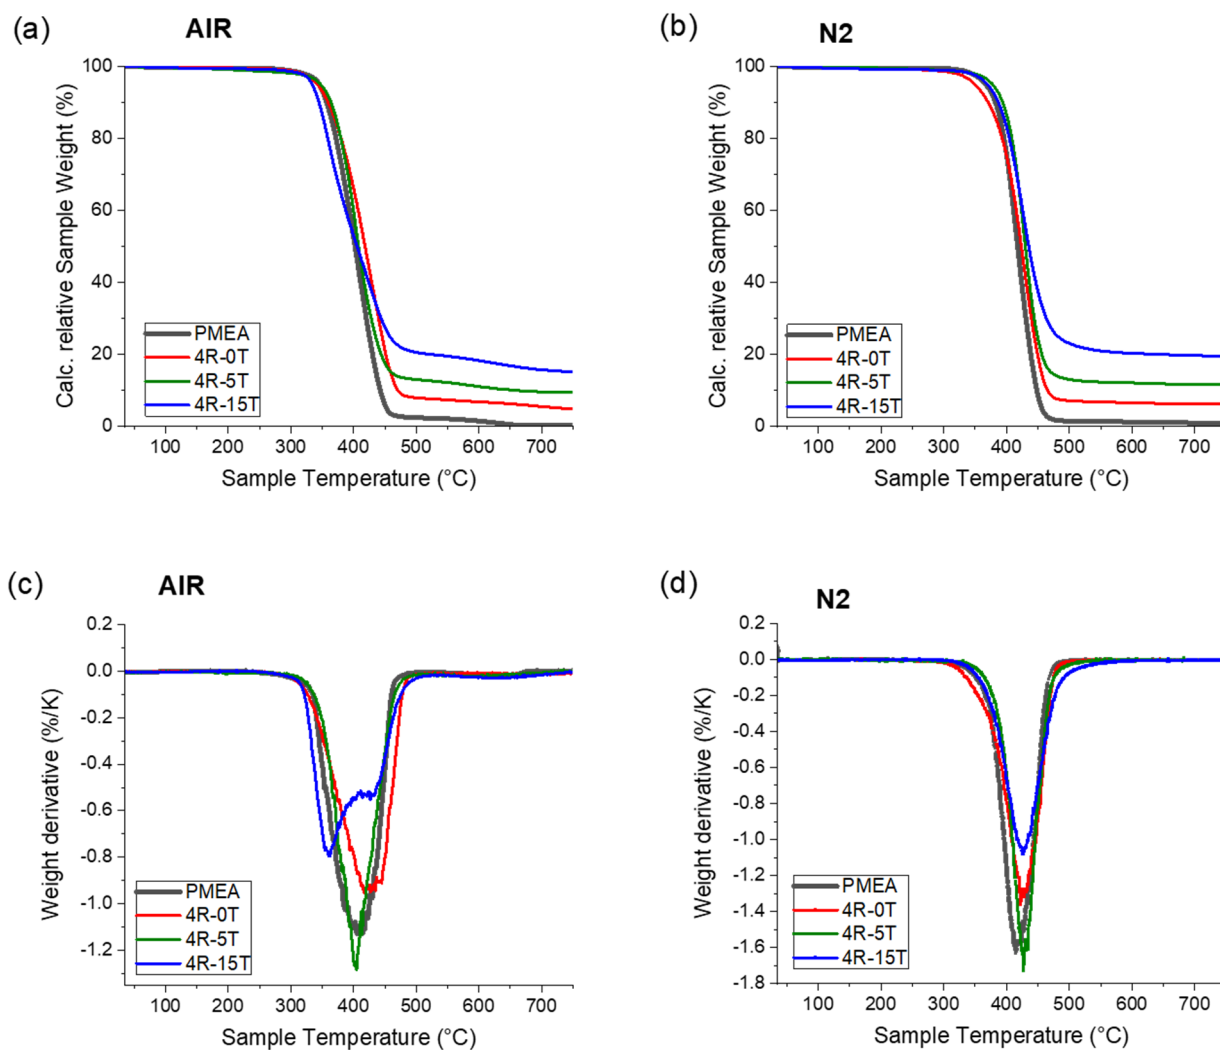

**SI-Figure S19:** TGA traces of the polyMEA/clay/silica nanocomposite elastomers: Effect of the silica content (0, 5, 15 wt.%): (a, c) in air; (b, d) in nitrogen atmosphere; (a,b) temperature-dependent relative weight; (c, d) derivative of the relative weight (dTGA, decomposition peaks).
